# Supplementary material for: A quantitative assessment of the chemical variation in food grade polyethylene cling film, a common wrapping material for illicit drugs, using attenuated total reflection-Fourier transform infrared spectroscopy
Source: Royal Society of Chemistry journal article supplement (doi:10.1039/c2ay05889h), 2012-01-01
Supplement: c2ay05889h.pdf [file c2ay05889h.pdf]

A quantitative assessment of the chemical variation in food grade polyethylene cling film, a common wrapping material for illicit drugs, using attenuated total reflection-Fourier transform infrared spectroscopy

Supporting information

Stephen W. Holman<sup>1\*</sup>, Trevor F. Emmett<sup>1</sup> and Michael D. Cole<sup>1</sup>

<sup>1</sup> Department of Life Sciences, Anglia Ruskin University, Cambridge, CB1 1PT, UK

✉ Current address: Michael Barber Centre for Mass Spectrometry, Manchester Interdisciplinary Centre, The University of Manchester, 131 Princess Street, Manchester, M1 7DN, UK

\*Address correspondence to:

Stephen W. Holman  
Michael Barber Centre for Mass Spectrometry  
Manchester Interdisciplinary Biocentre  
The University of Manchester  
131 Princess Street  
Manchester  
M1 7DN  
UK

E-mail: [stephen.holman@manchester.ac.uk](mailto:stephen.holman@manchester.ac.uk)

Tel: +44 161 306 4821

Fax: +44 161 306 8918

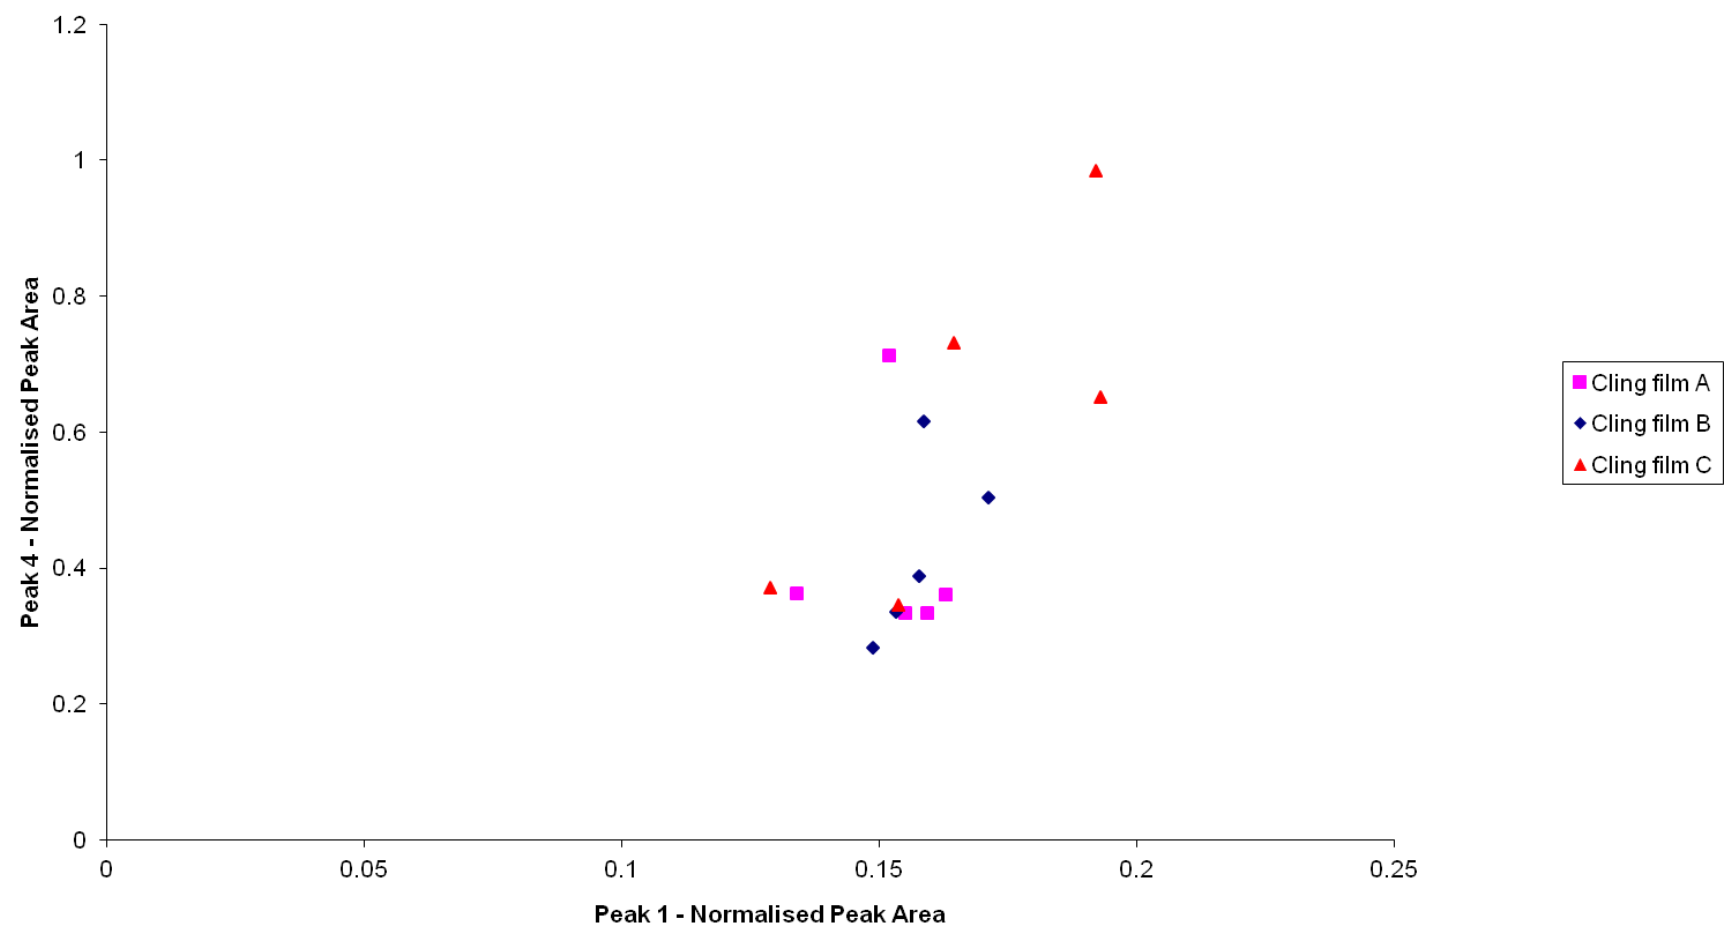

Figure S1 Bivariate plot of the normalised peak areas for peaks 1 and 4 from the five high resolution IR spectra recorded for cling films A, B and C

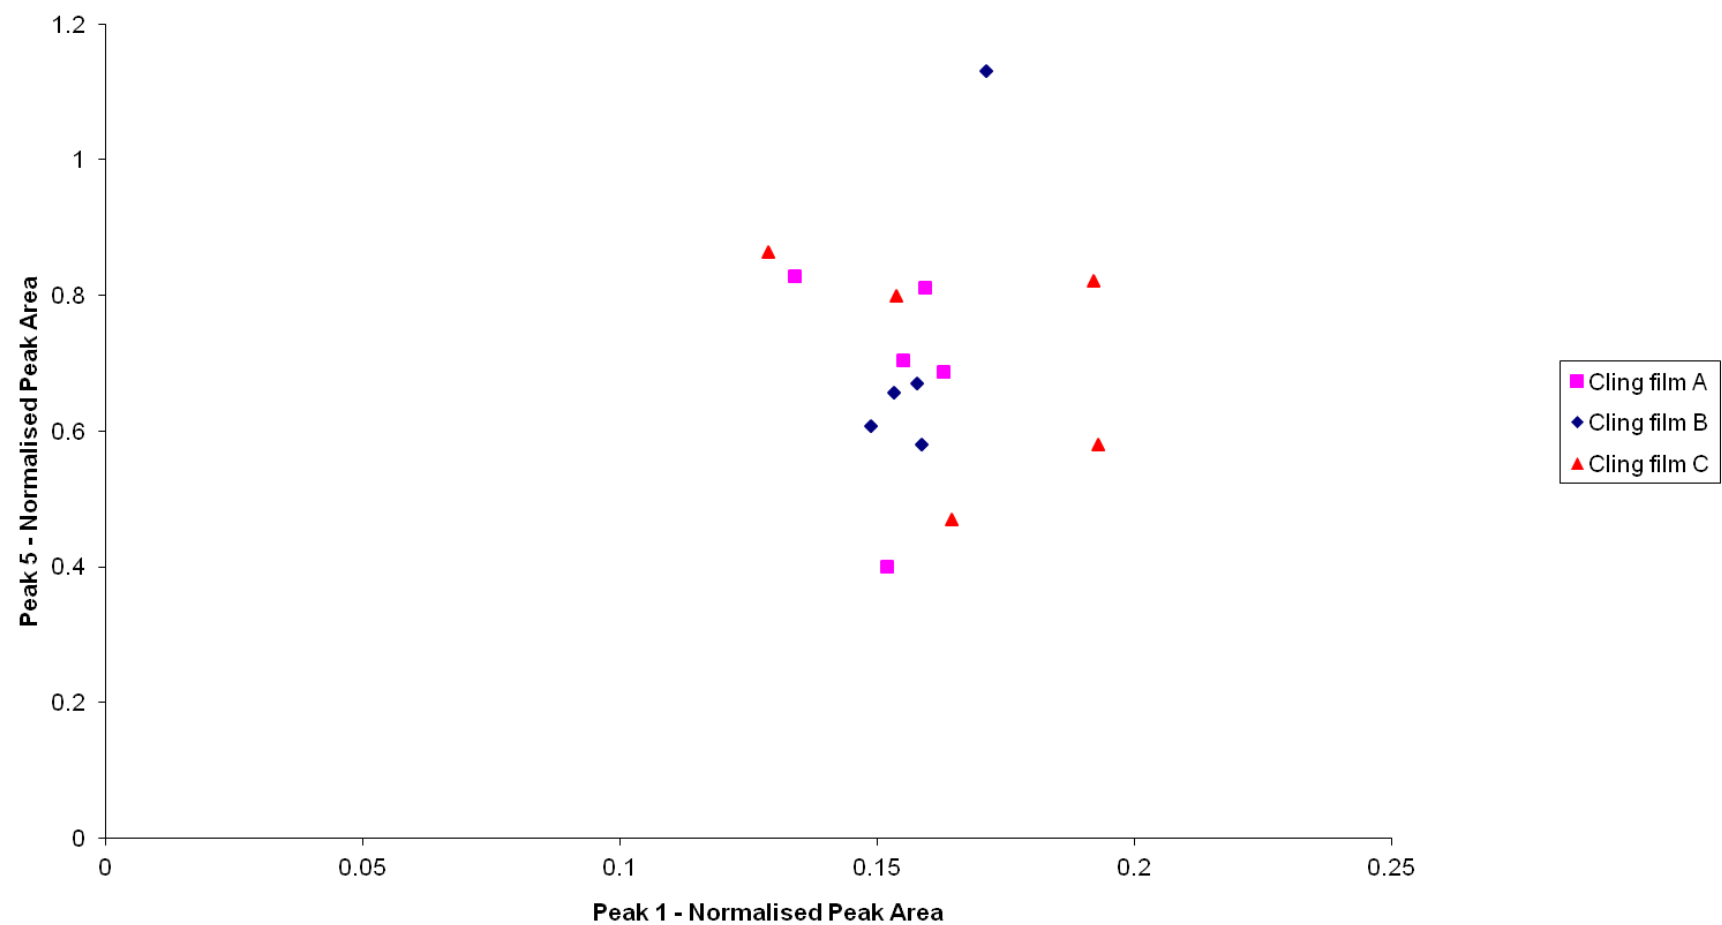

Figure S2 Bivariate plot of the normalised peak areas for peaks 1 and 5 from the five high resolution IR spectra recorded for cling films A, B and C

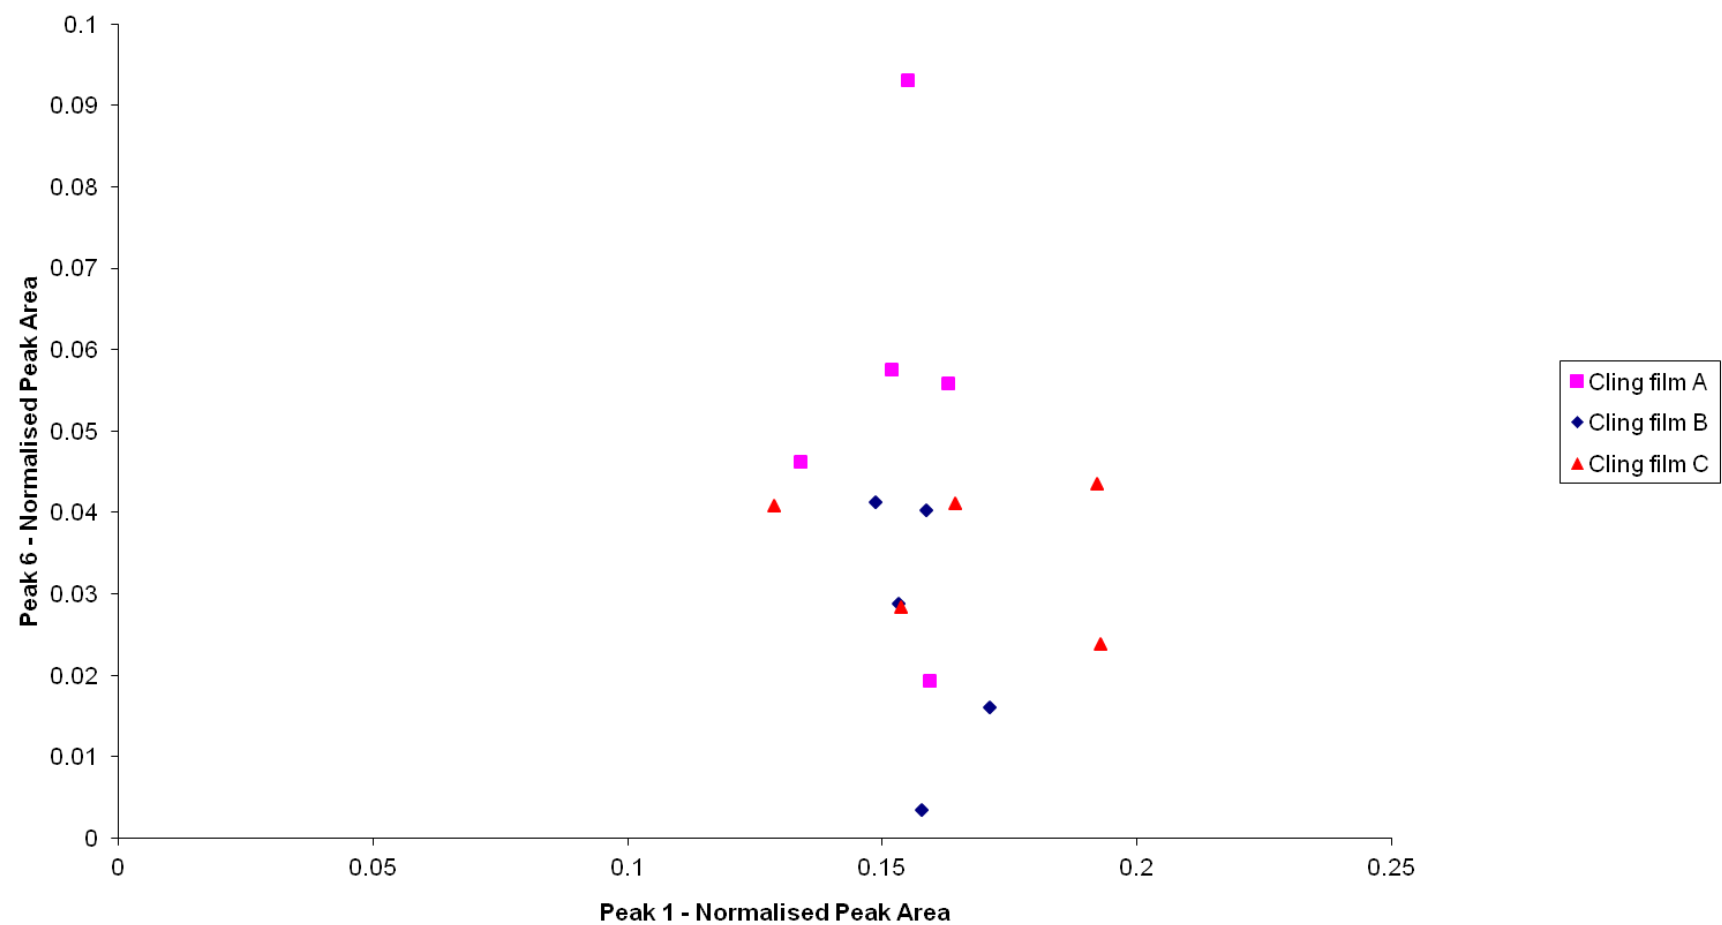

Figure S3 Bivariate plot of the normalised peak areas for peaks 1 and 6 from the five high resolution IR spectra recorded for cling films A, B and C

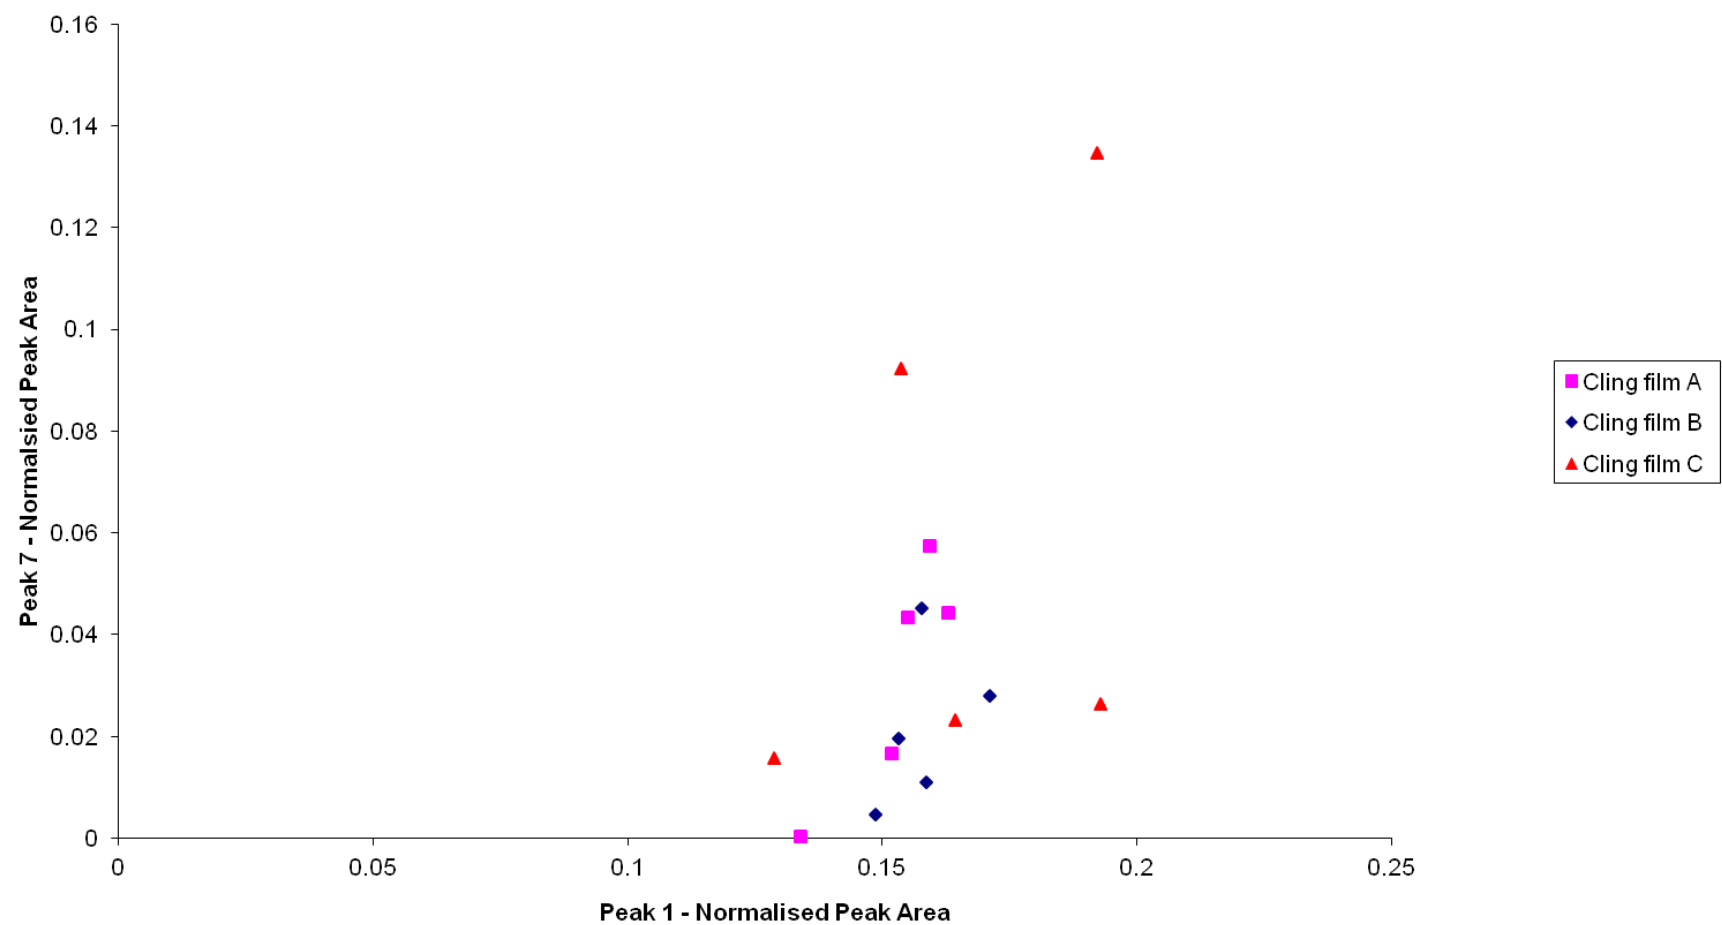

Figure S4 Bivariate plot of the normalised peak areas for peaks 1 and 7 from the five high resolution IR spectra recorded for cling films A, B and C

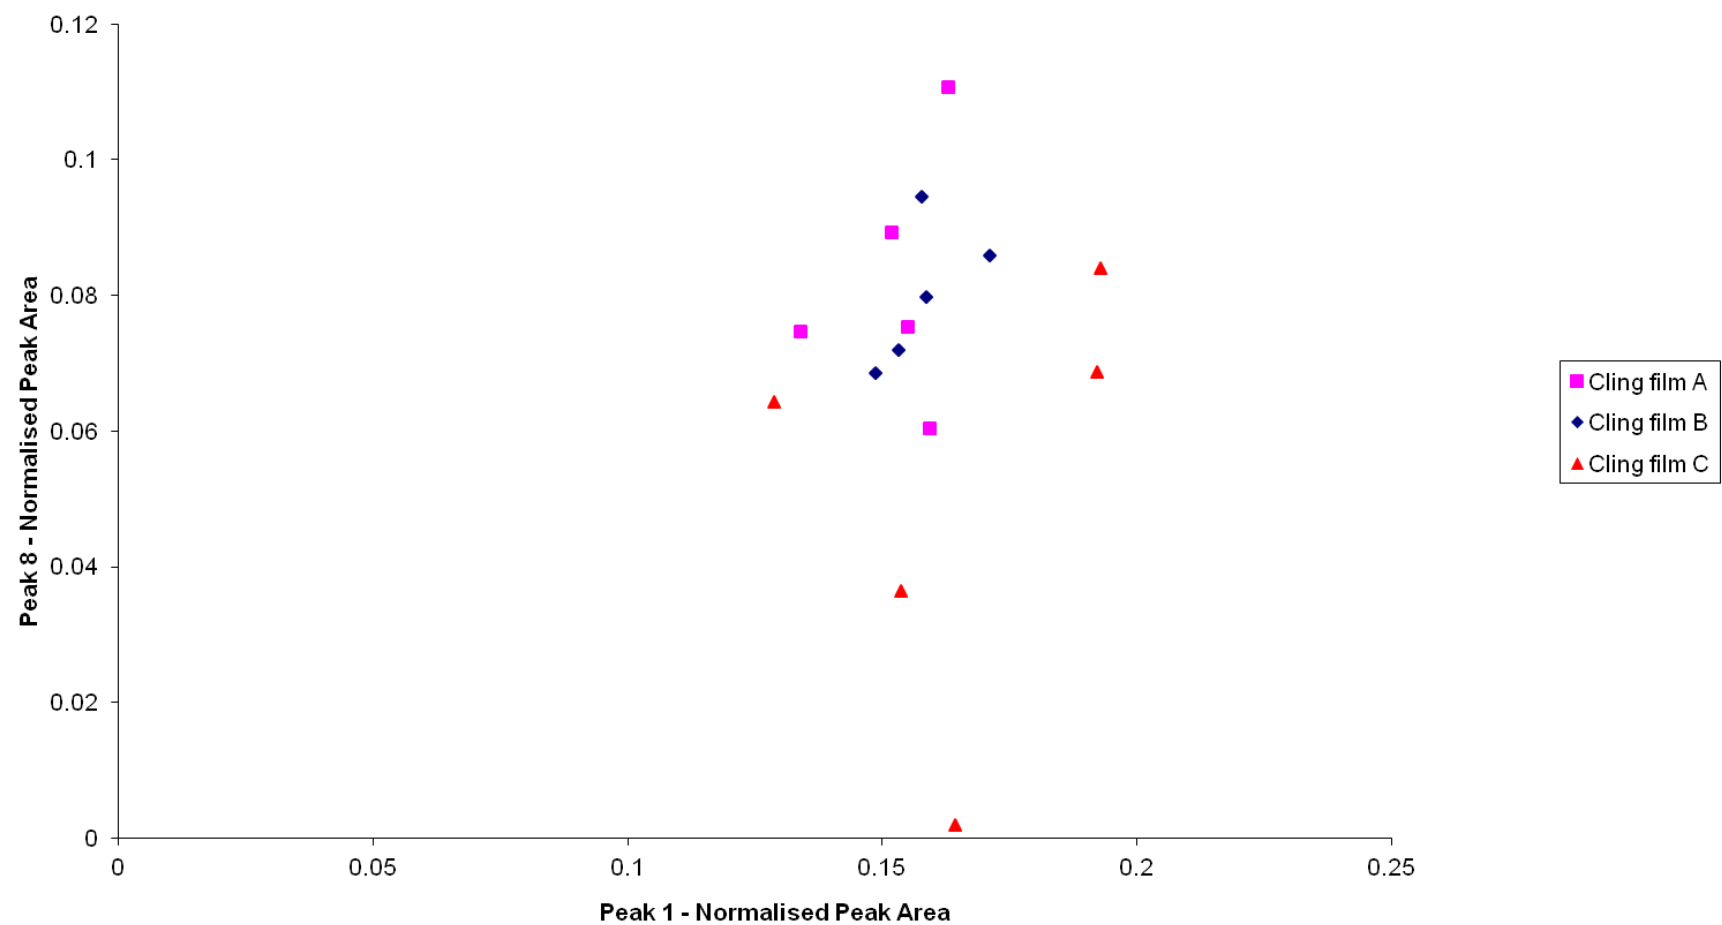

Figure S5 Bivariate plot of the normalised peak areas for peaks 1 and 8 from the five high resolution IR spectra recorded for cling films A, B and C

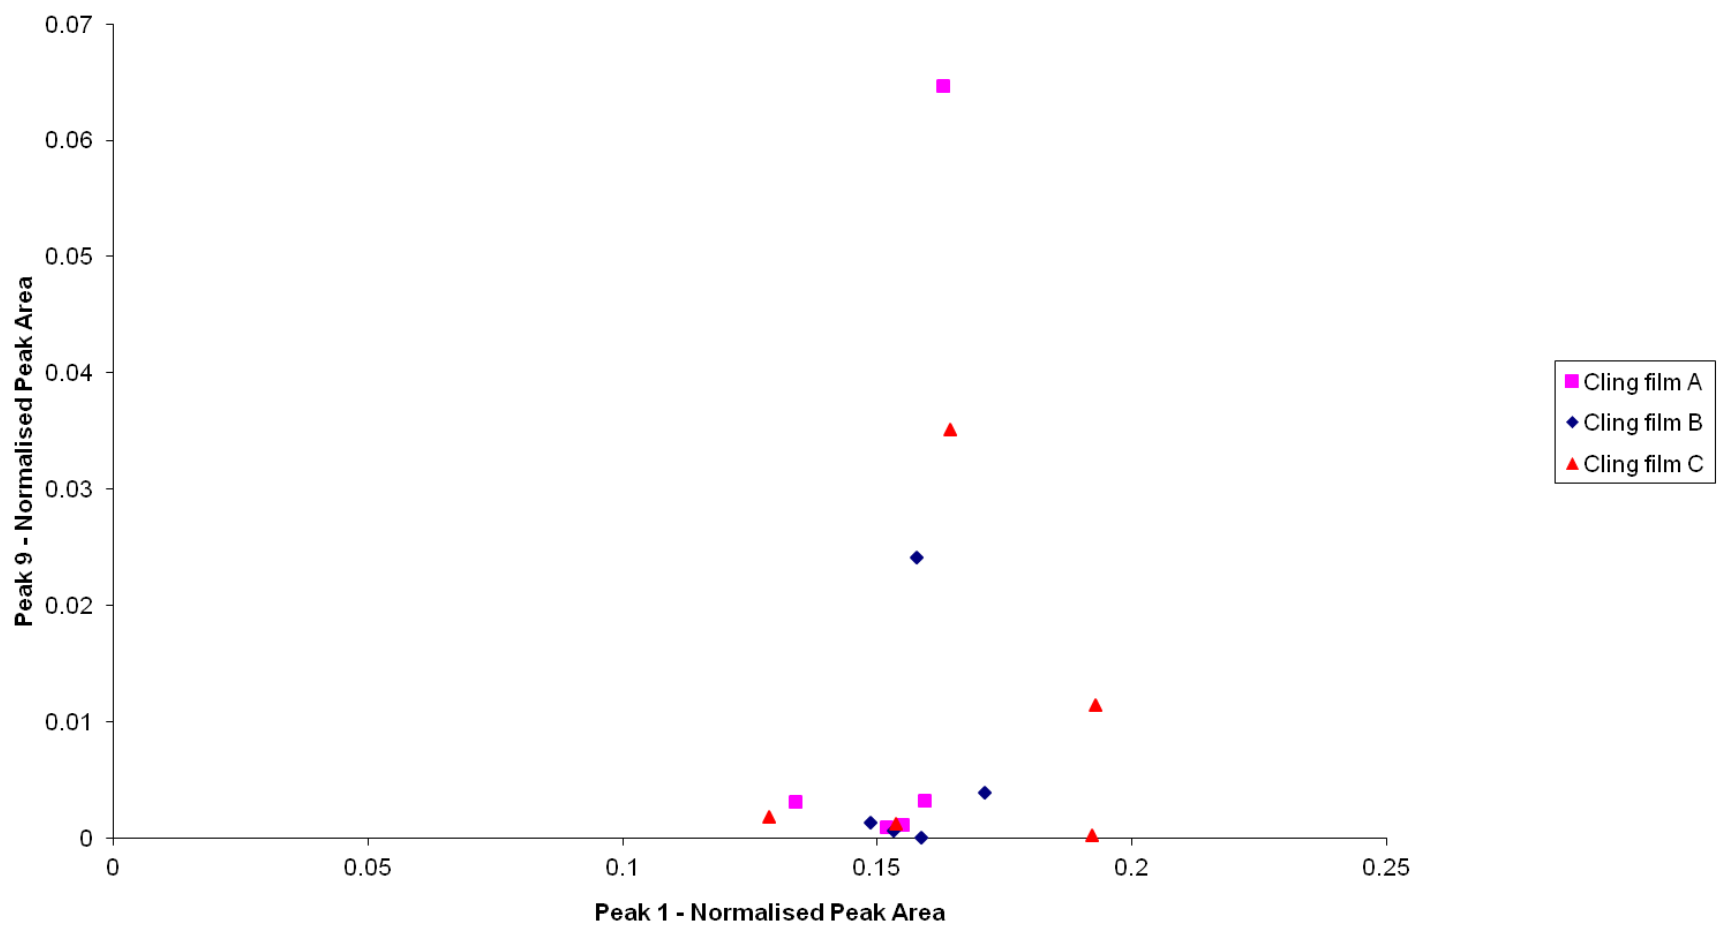

Figure S6 Bivariate plot of the normalised peak areas for peaks 1 and 9 from the five high resolution IR spectra recorded for cling films A, B and C

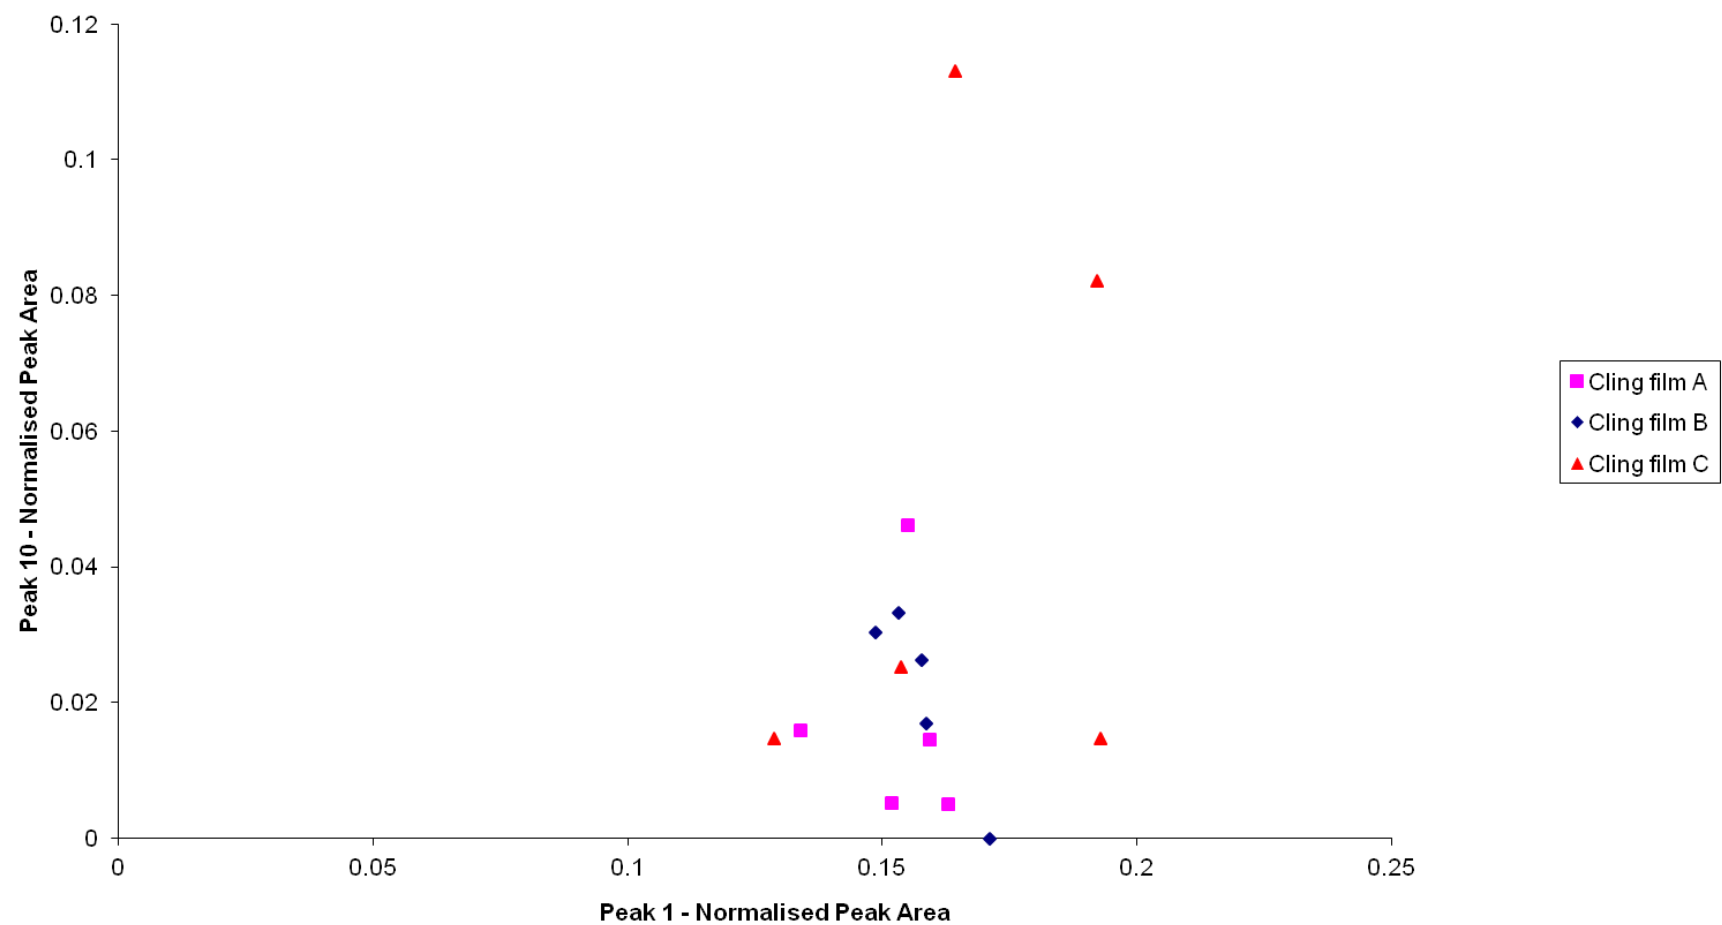

Figure S7 Bivariate plot of the normalised peak areas for peaks 1 and 10 from the five high resolution IR spectra recorded for cling films A, B and C



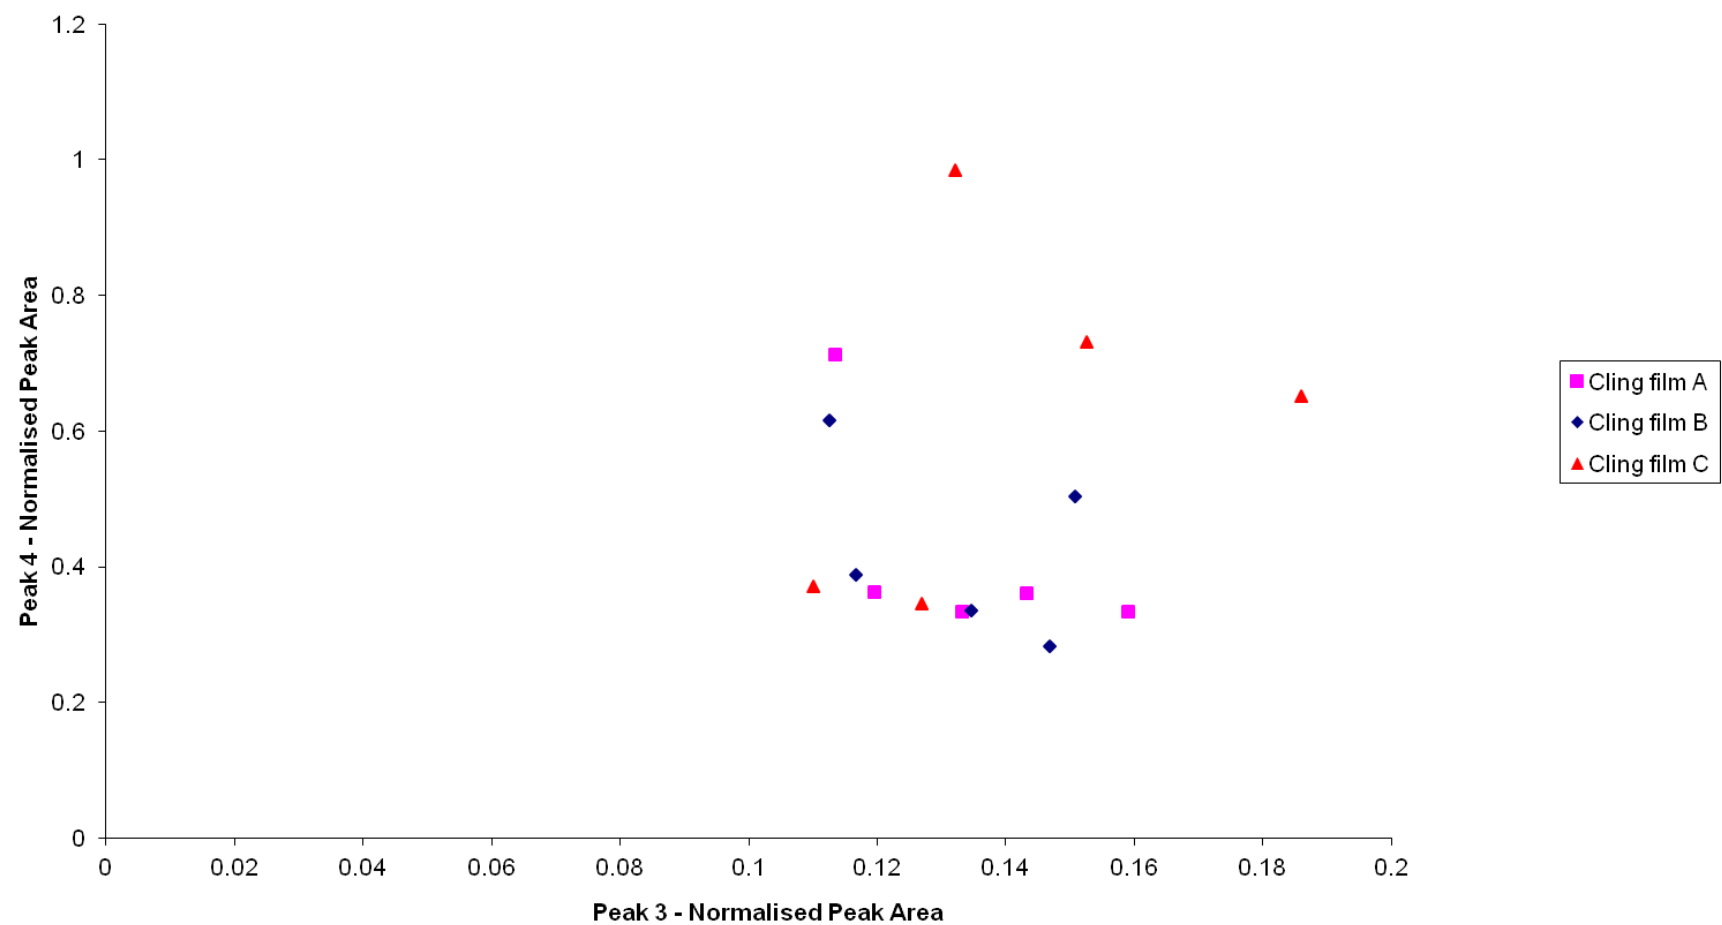

Figure S8 Bivariate plot of the normalised peak areas for peaks 3 and 4 from the five high resolution IR spectra recorded for cling films A, B and C

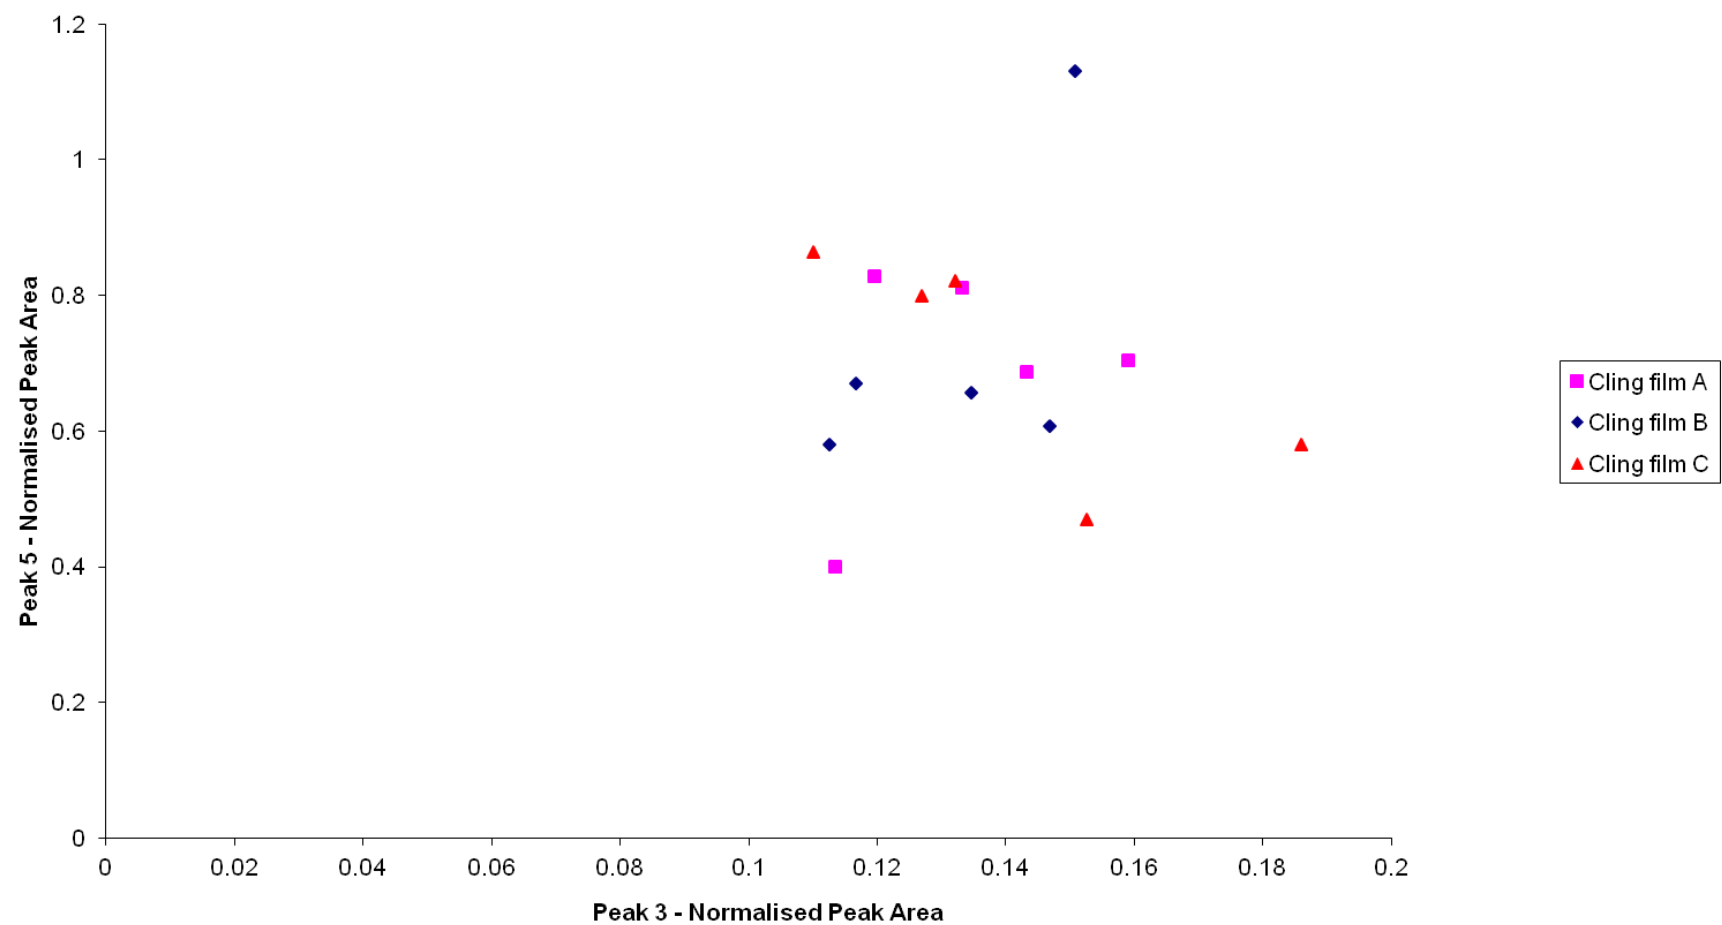

Figure S9 Bivariate plot of the normalised peak areas for peaks 3 and 5 from the five high resolution IR spectra recorded for cling films A, B and C

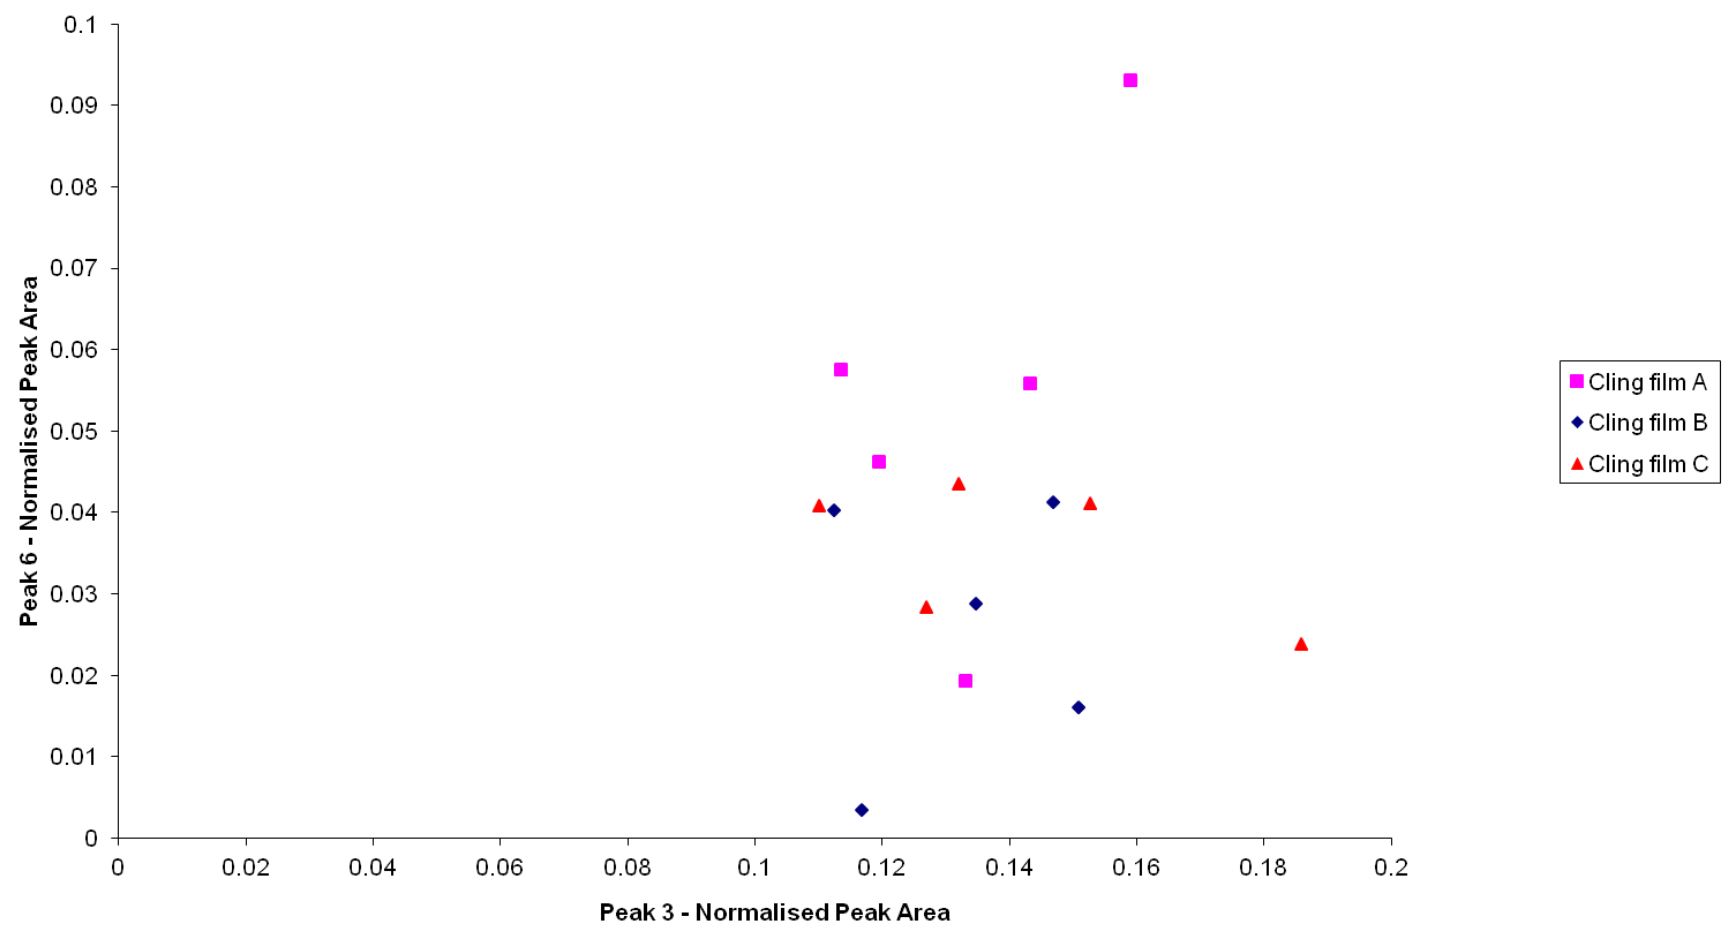

Figure S10 Bivariate plot of the normalised peak areas for peaks 3 and 6 from the five high resolution IR spectra recorded for cling films A, B and C

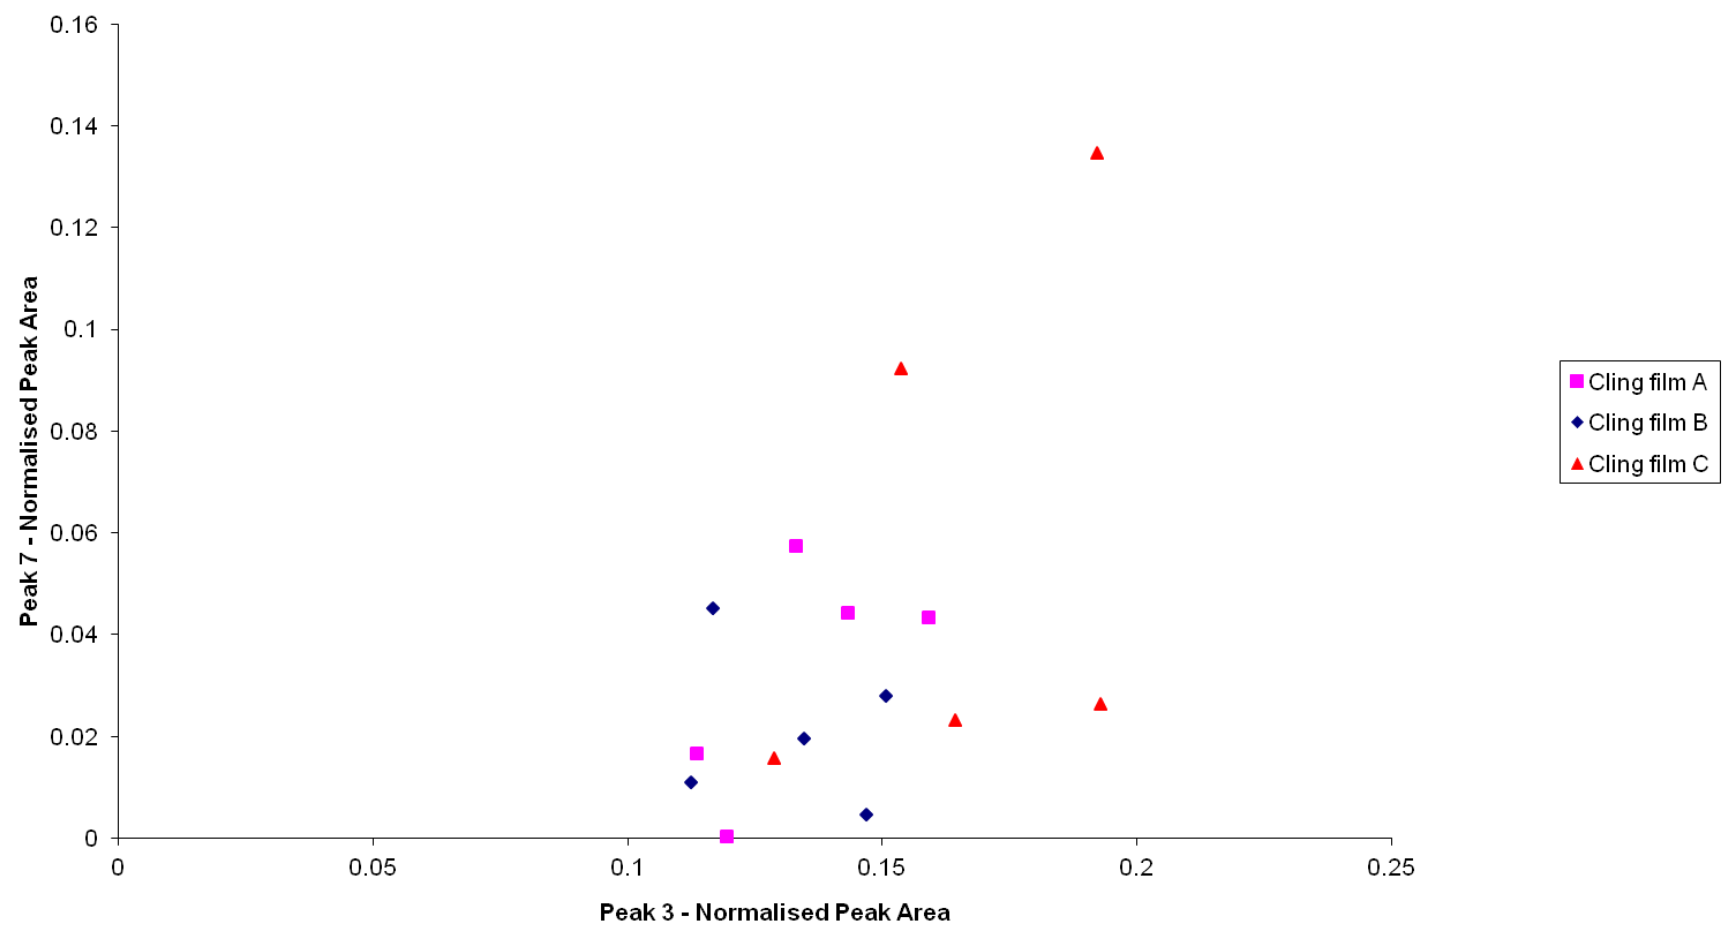

Figure S11 Bivariate plot of the normalised peak areas for peaks 3 and 7 from the five high resolution IR spectra recorded for cling films A, B and C

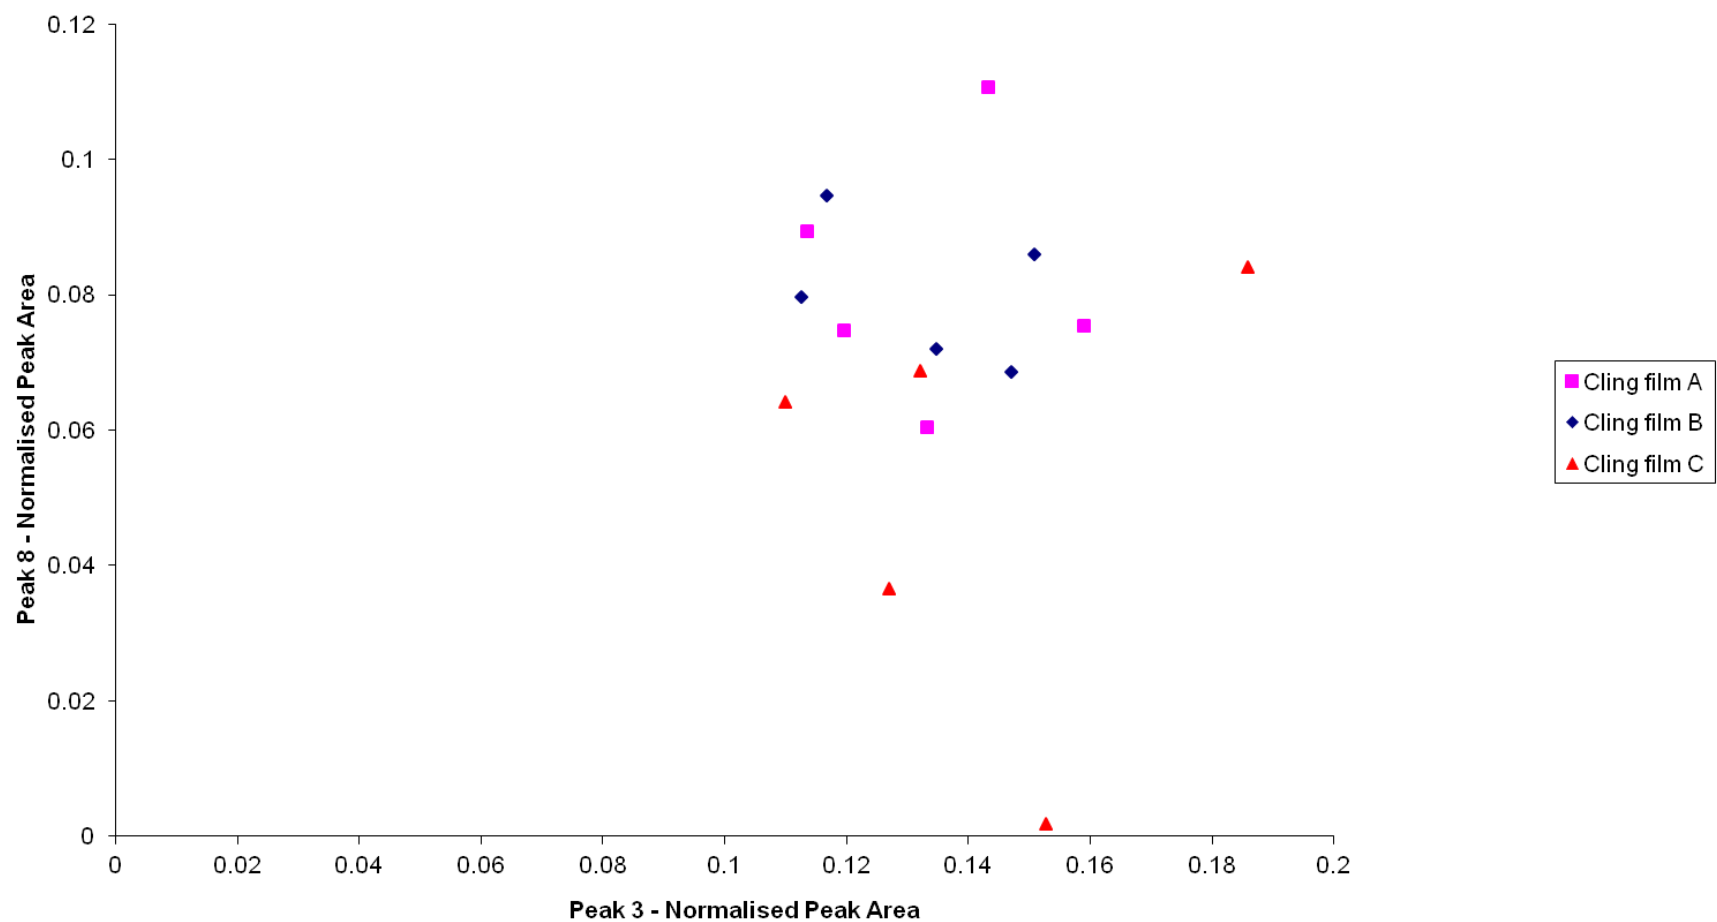

Figure S12 Bivariate plot of the normalised peak areas for peaks 3 and 8 from the five high resolution IR spectra recorded for cling films A, B and C

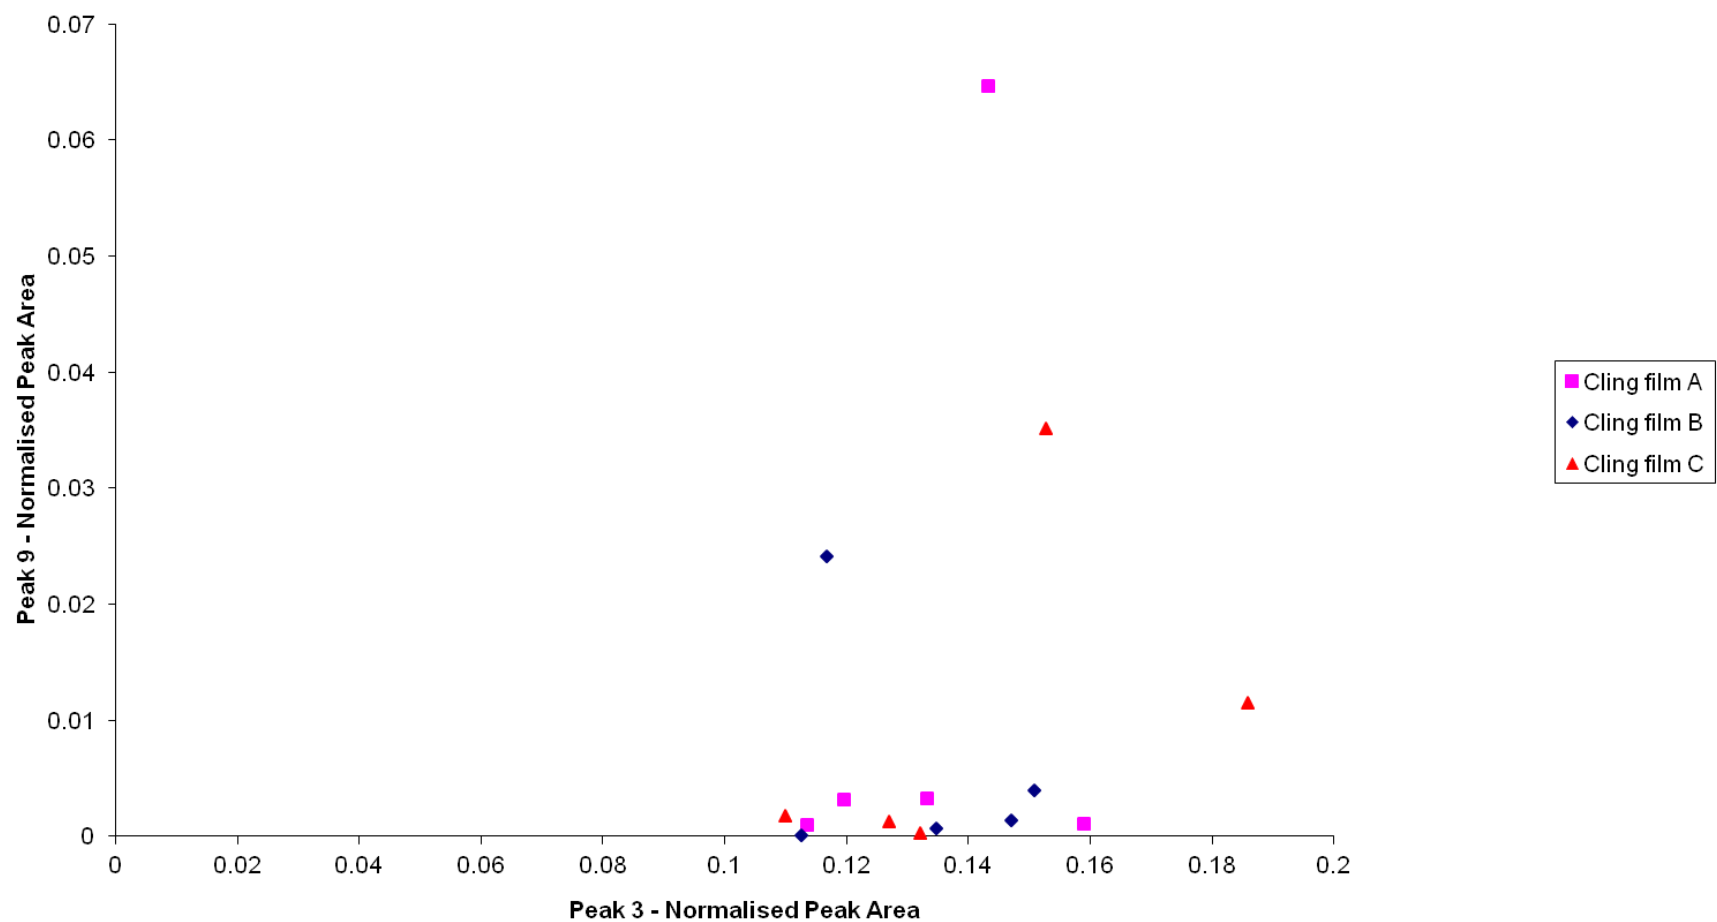

Figure S13 Bivariate plot of the normalised peak areas for peaks 3 and 9 from the five high resolution IR spectra recorded for cling films A, B and C

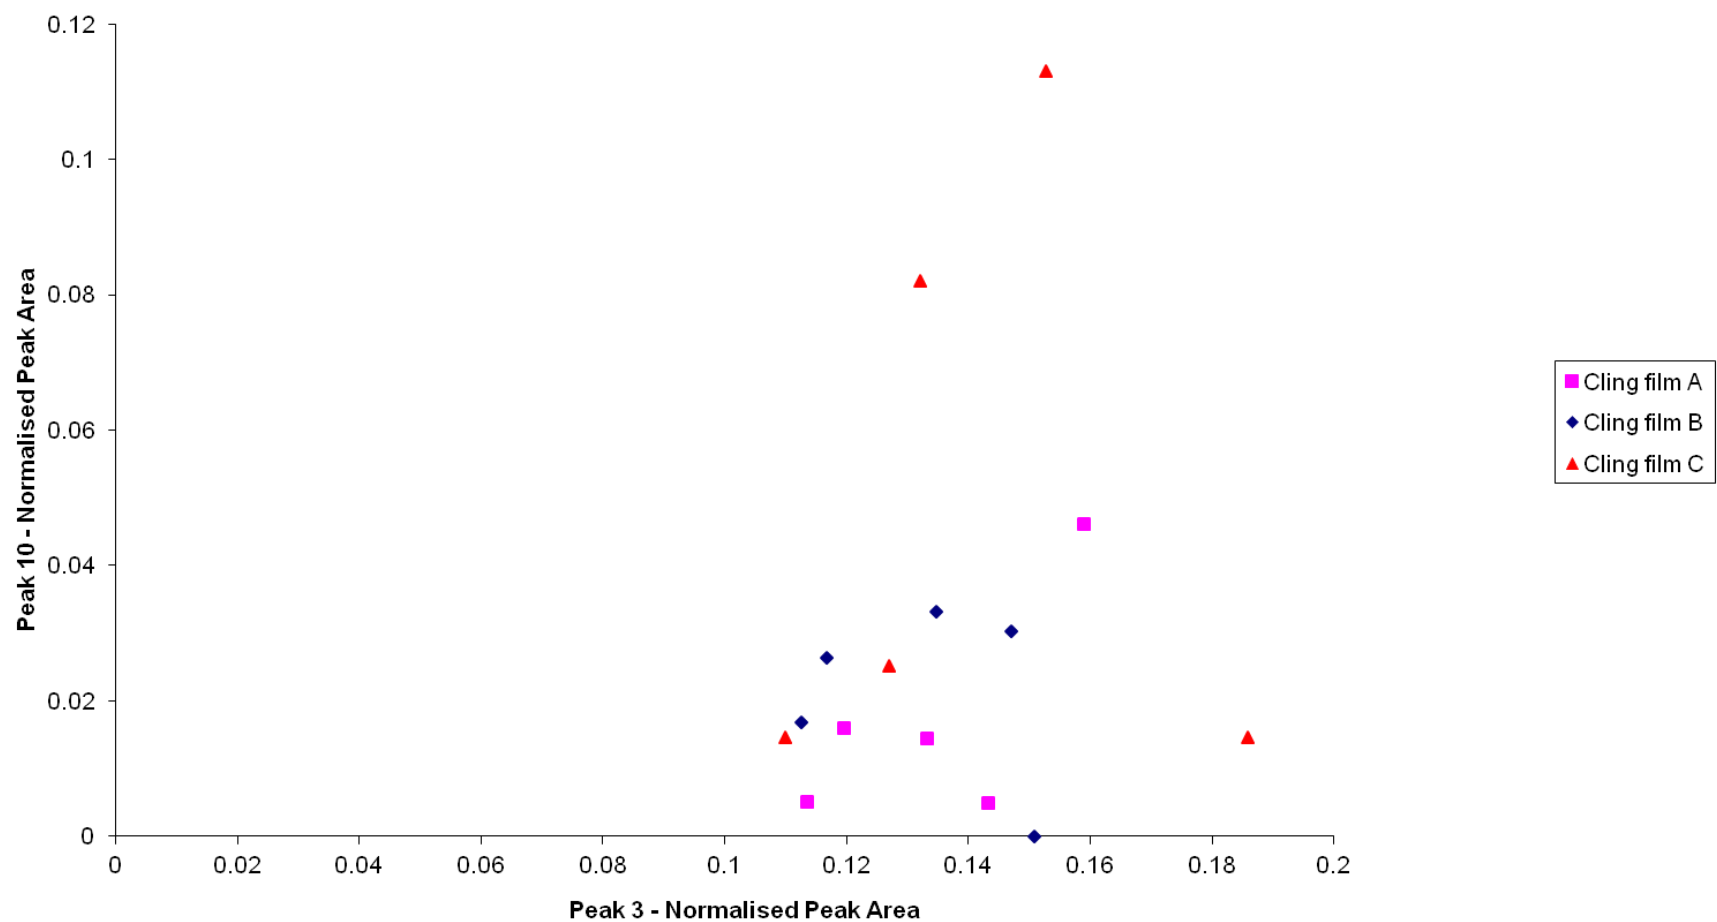

Figure S14 Bivariate plot of the normalised peak areas for peaks 3 and 10 from the five high resolution IR spectra recorded for cling films A, B and C

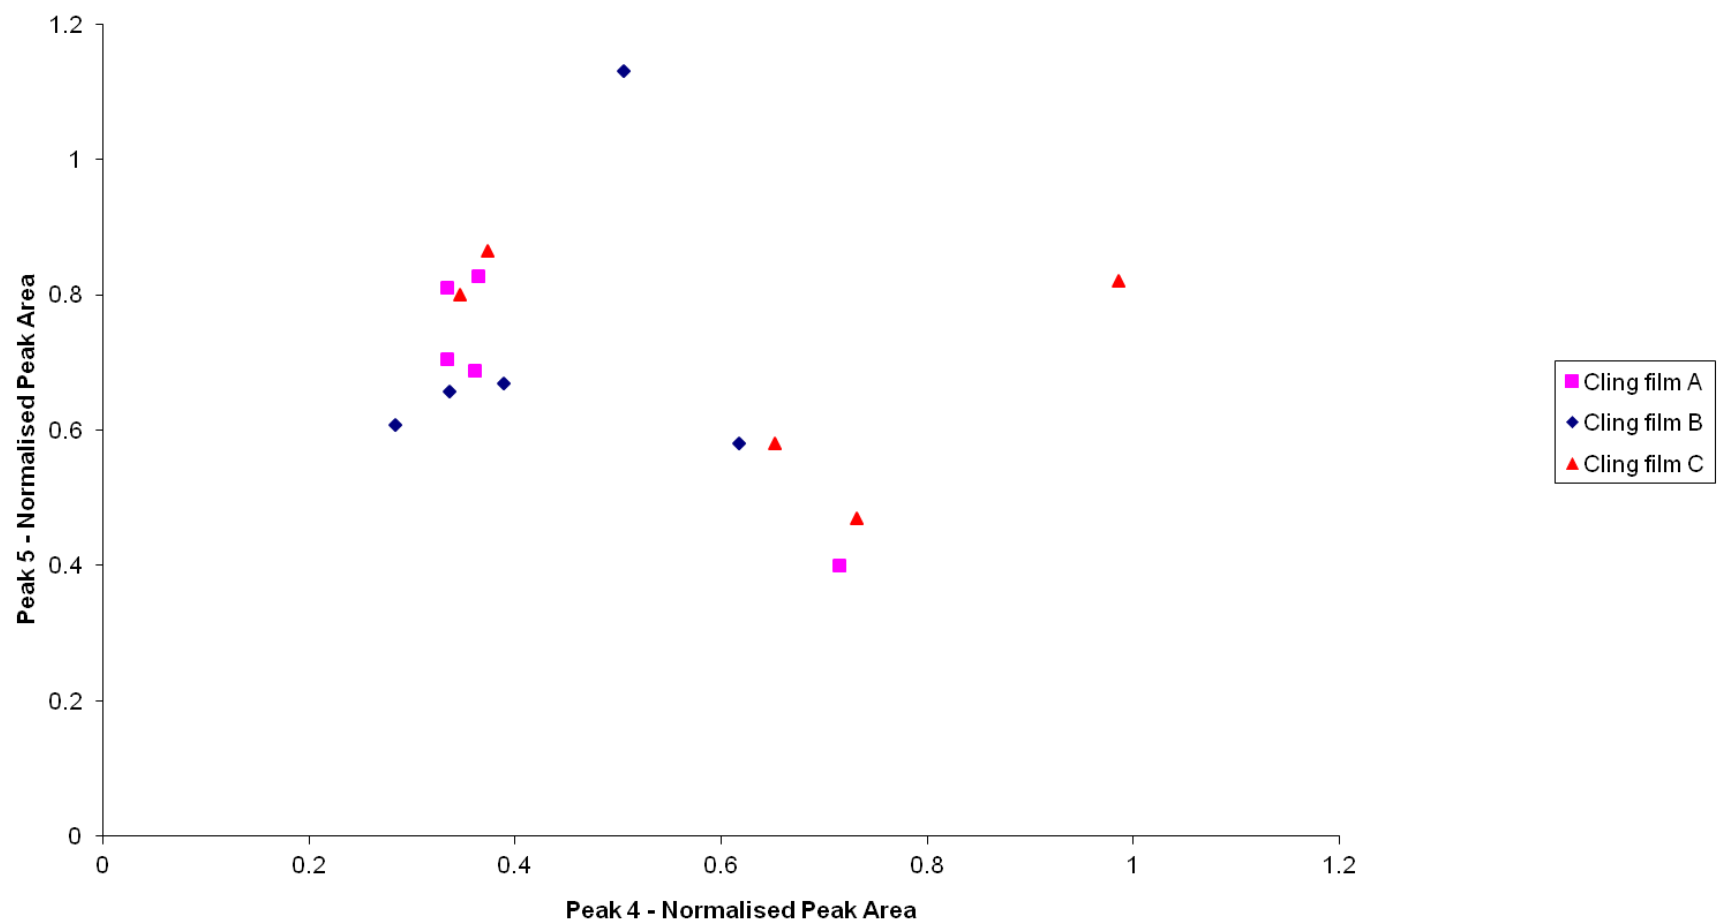

Figure S15 Bivariate plot of the normalised peak areas for peaks 4 and 5 from the five high resolution IR spectra recorded for cling films A, B and C



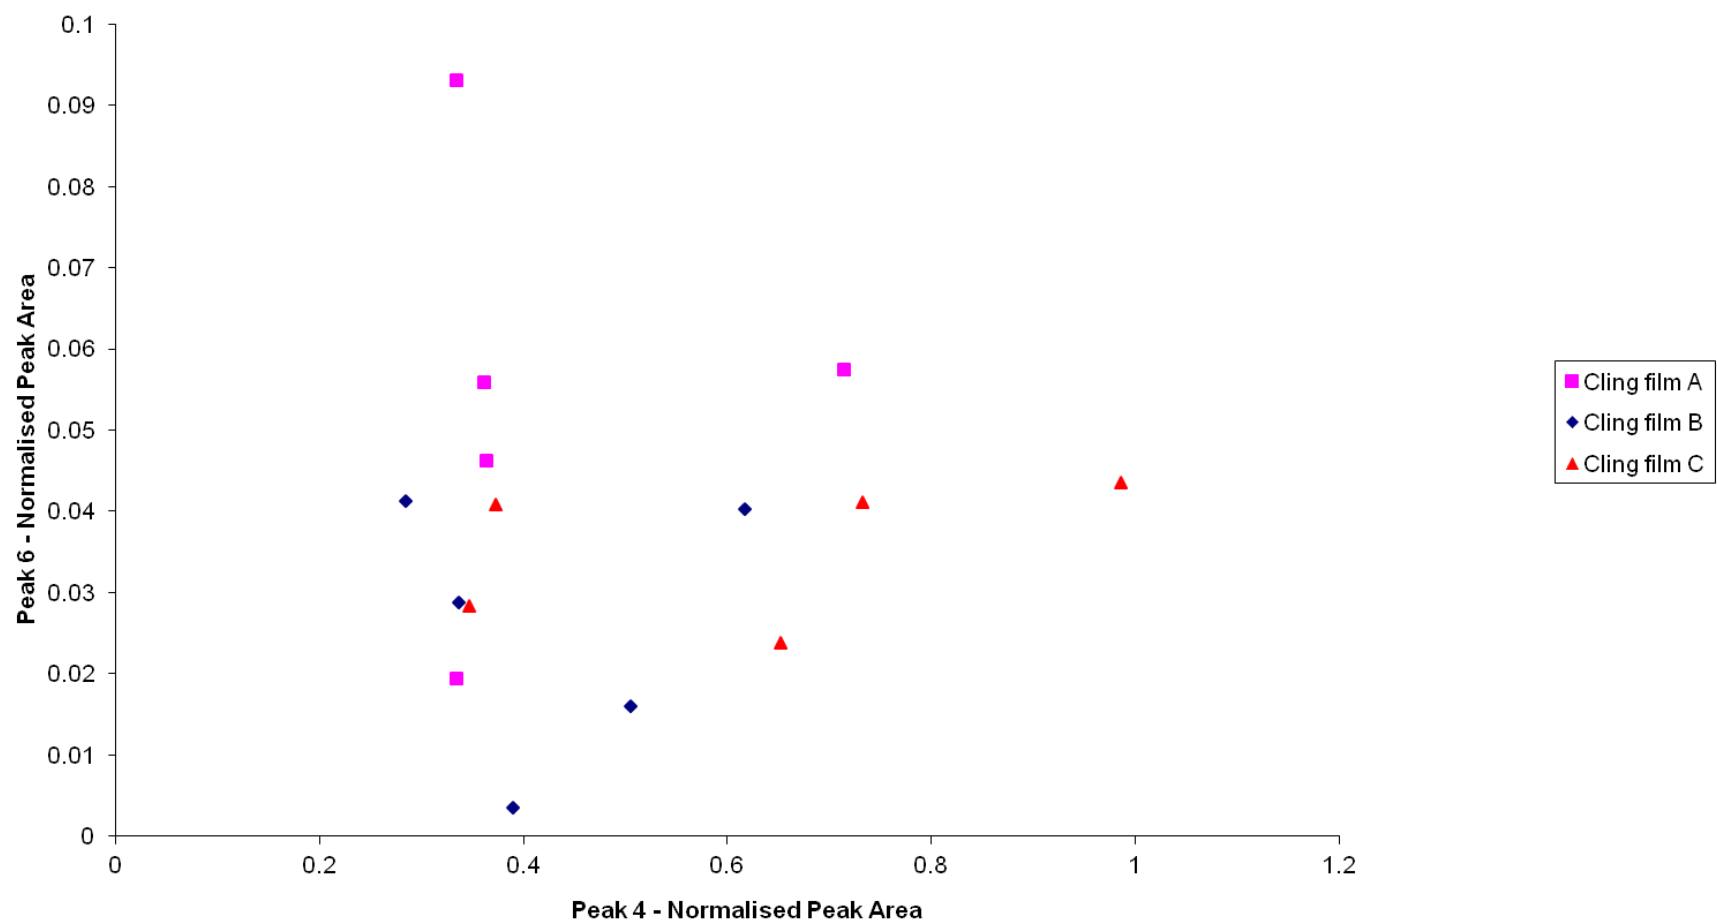

Figure S16 Bivariate plot of the normalised peak areas for peaks 4 and 6 from the five high resolution IR spectra recorded for cling films A,B and C

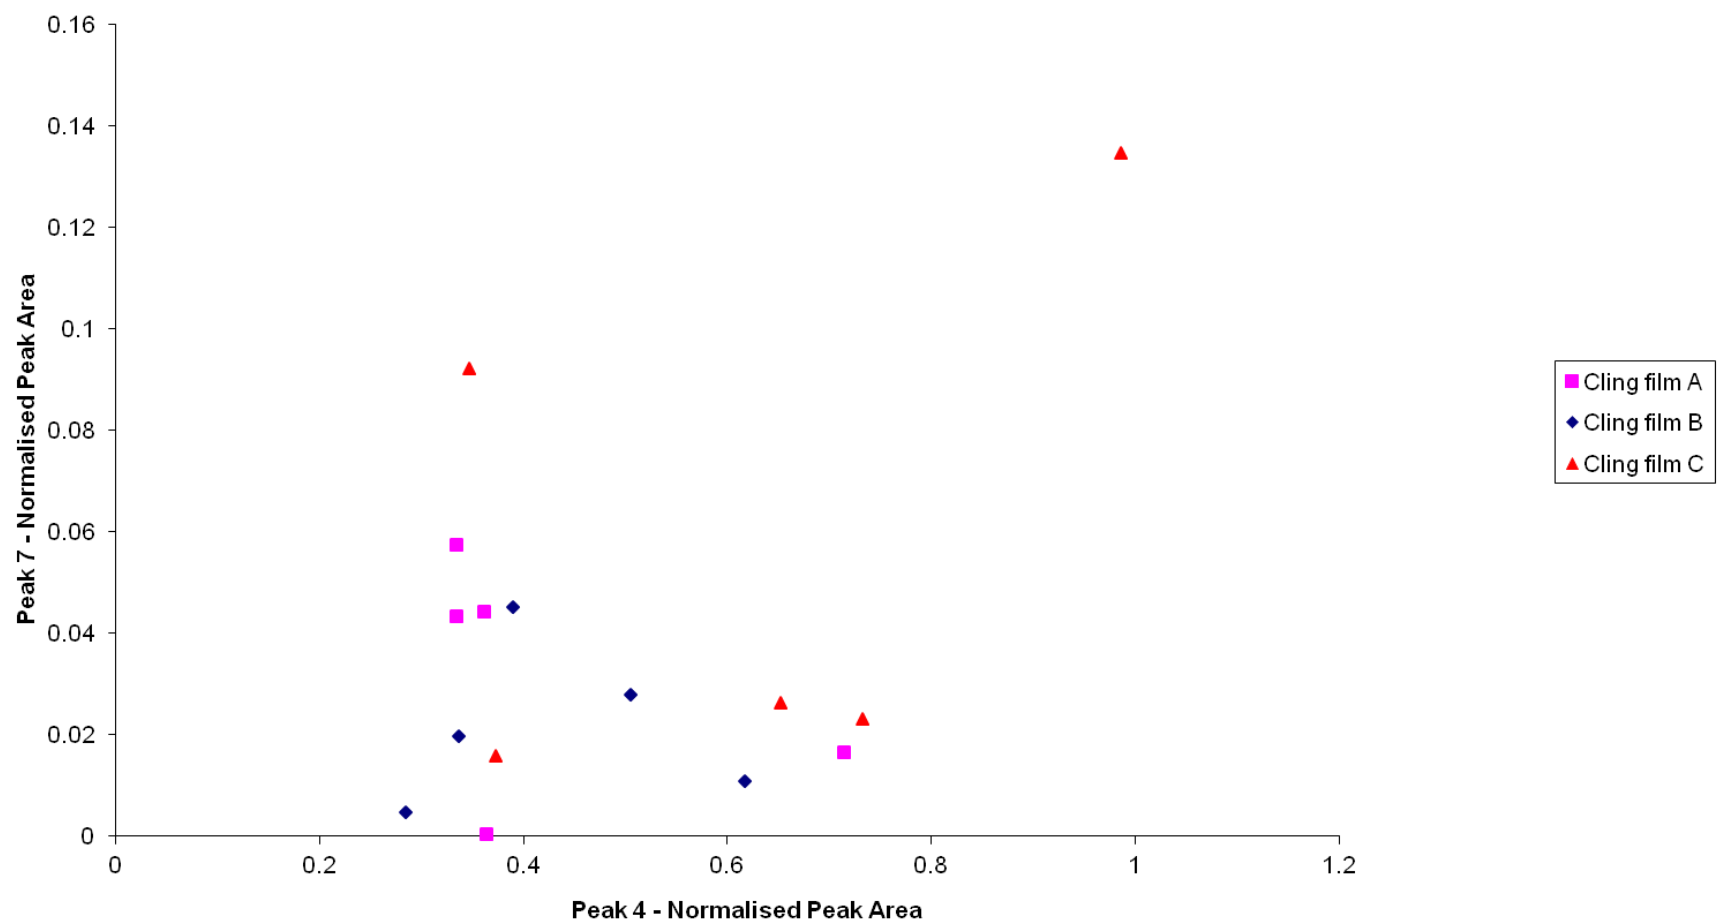

Figure S17 Bivariate plot of the normalised peak areas for peaks 4 and 7 from the five high resolution IR spectra recorded for cling films A,B and C

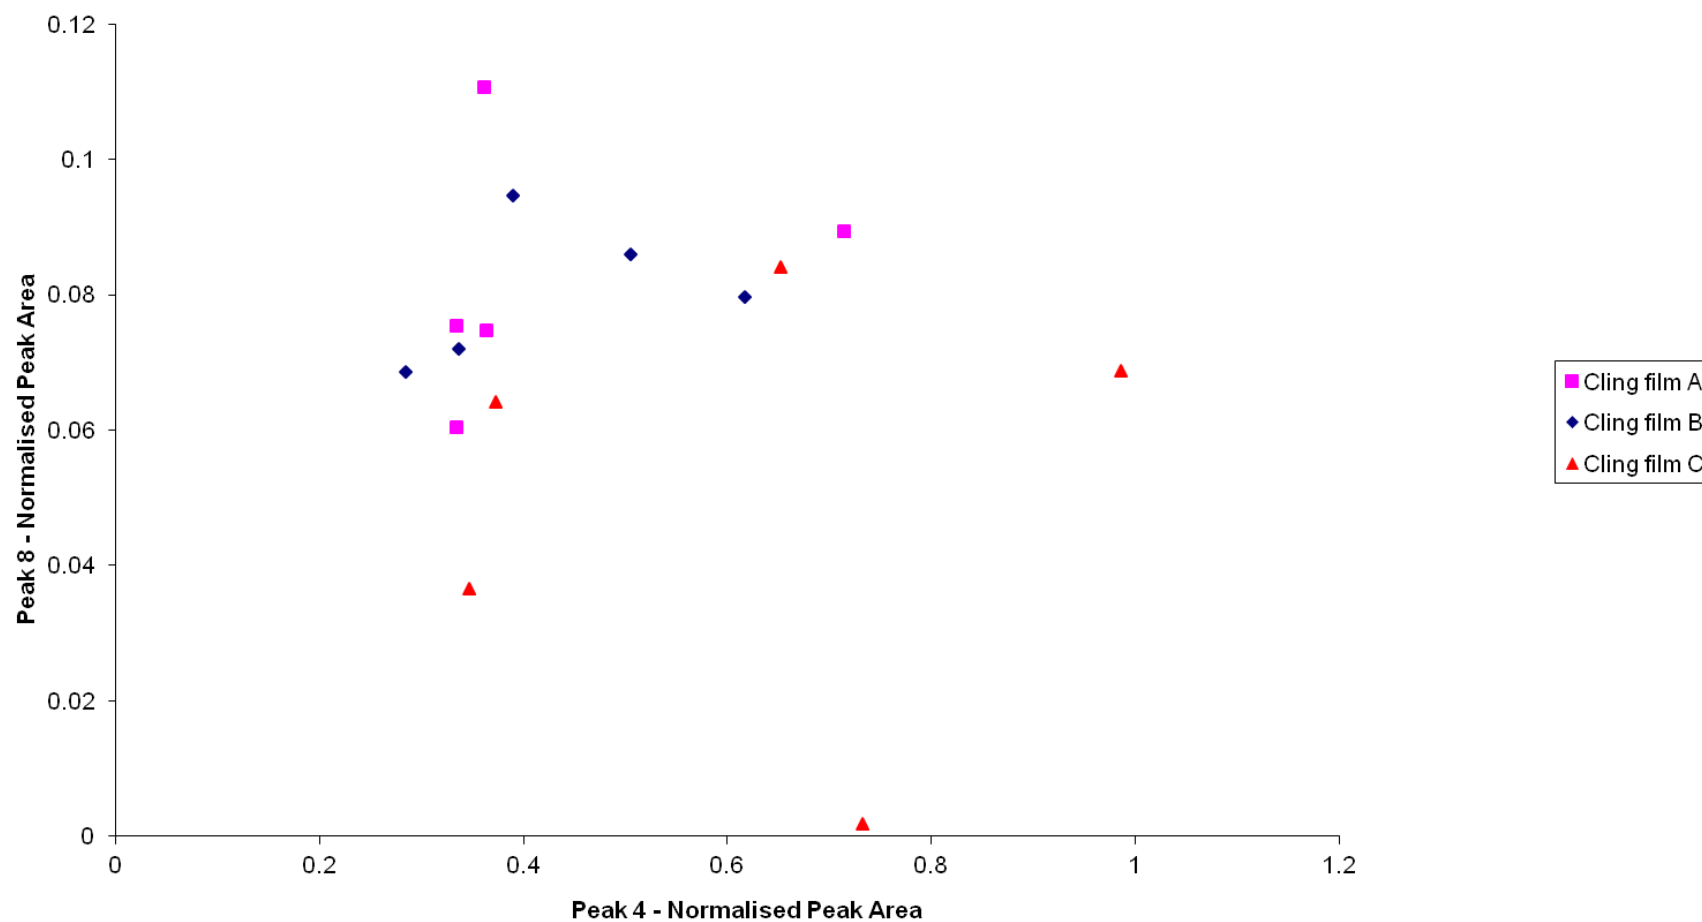

Figure S18 Bivariate plot of the normalised peak areas for peaks 4 and 8 from the five high resolution IR spectra recorded for cling films A,B and C

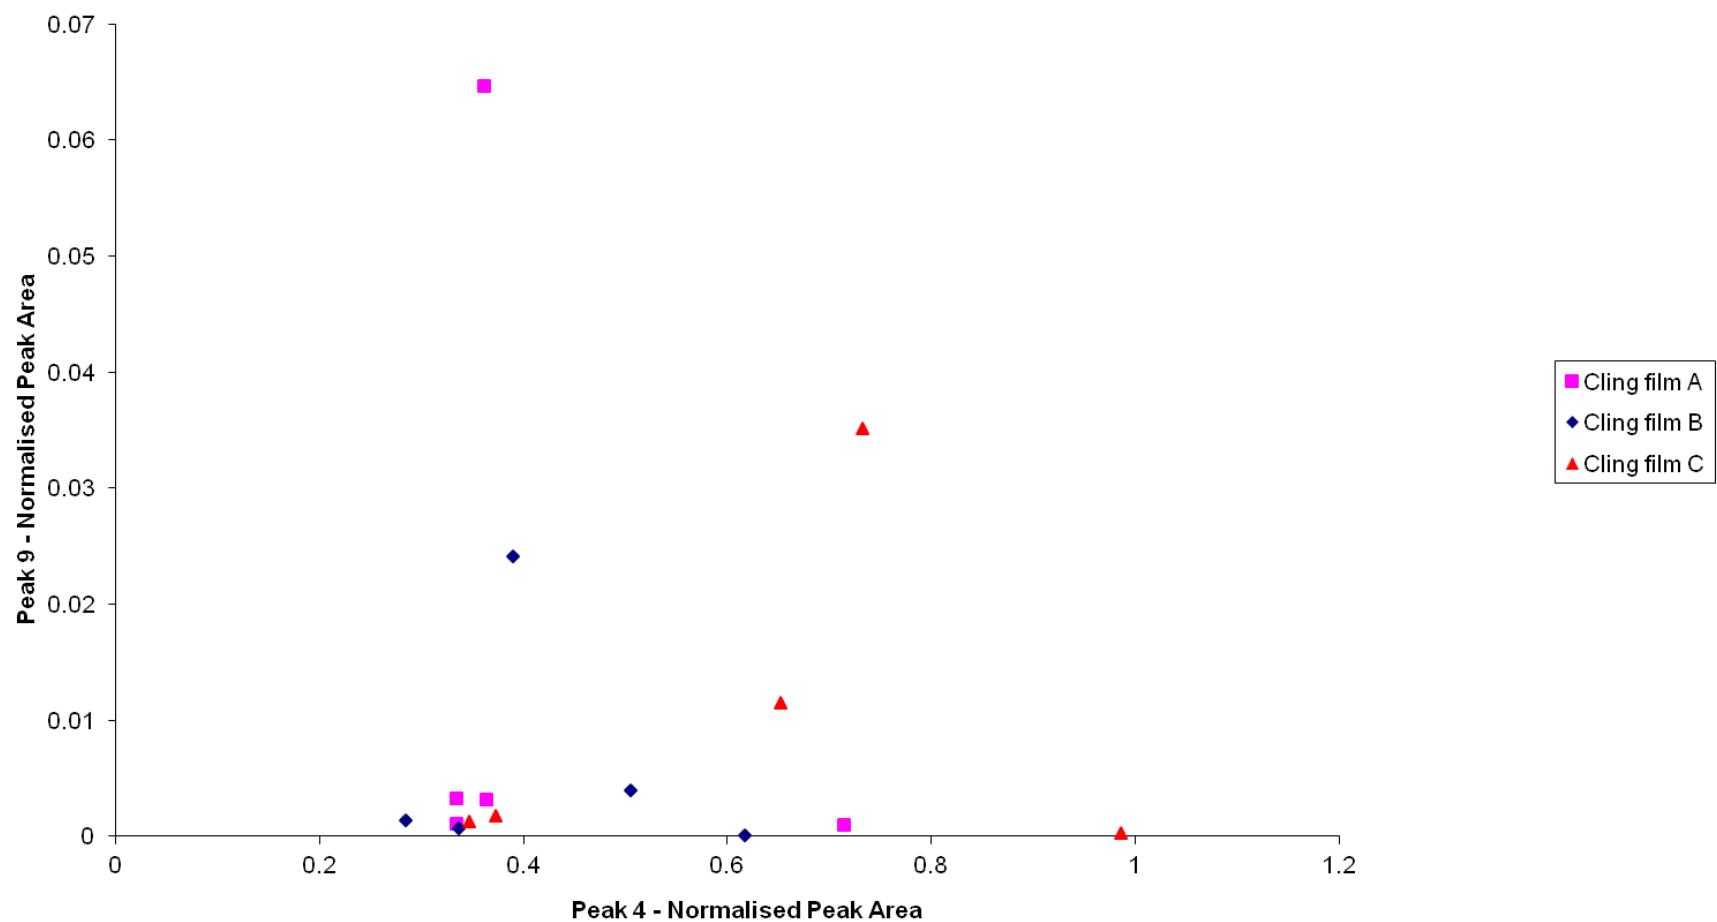

Figure S19 Bivariate plot of the normalised peak areas for peaks 4 and 9 from the five high resolution IR spectra recorded for cling films A,B and C

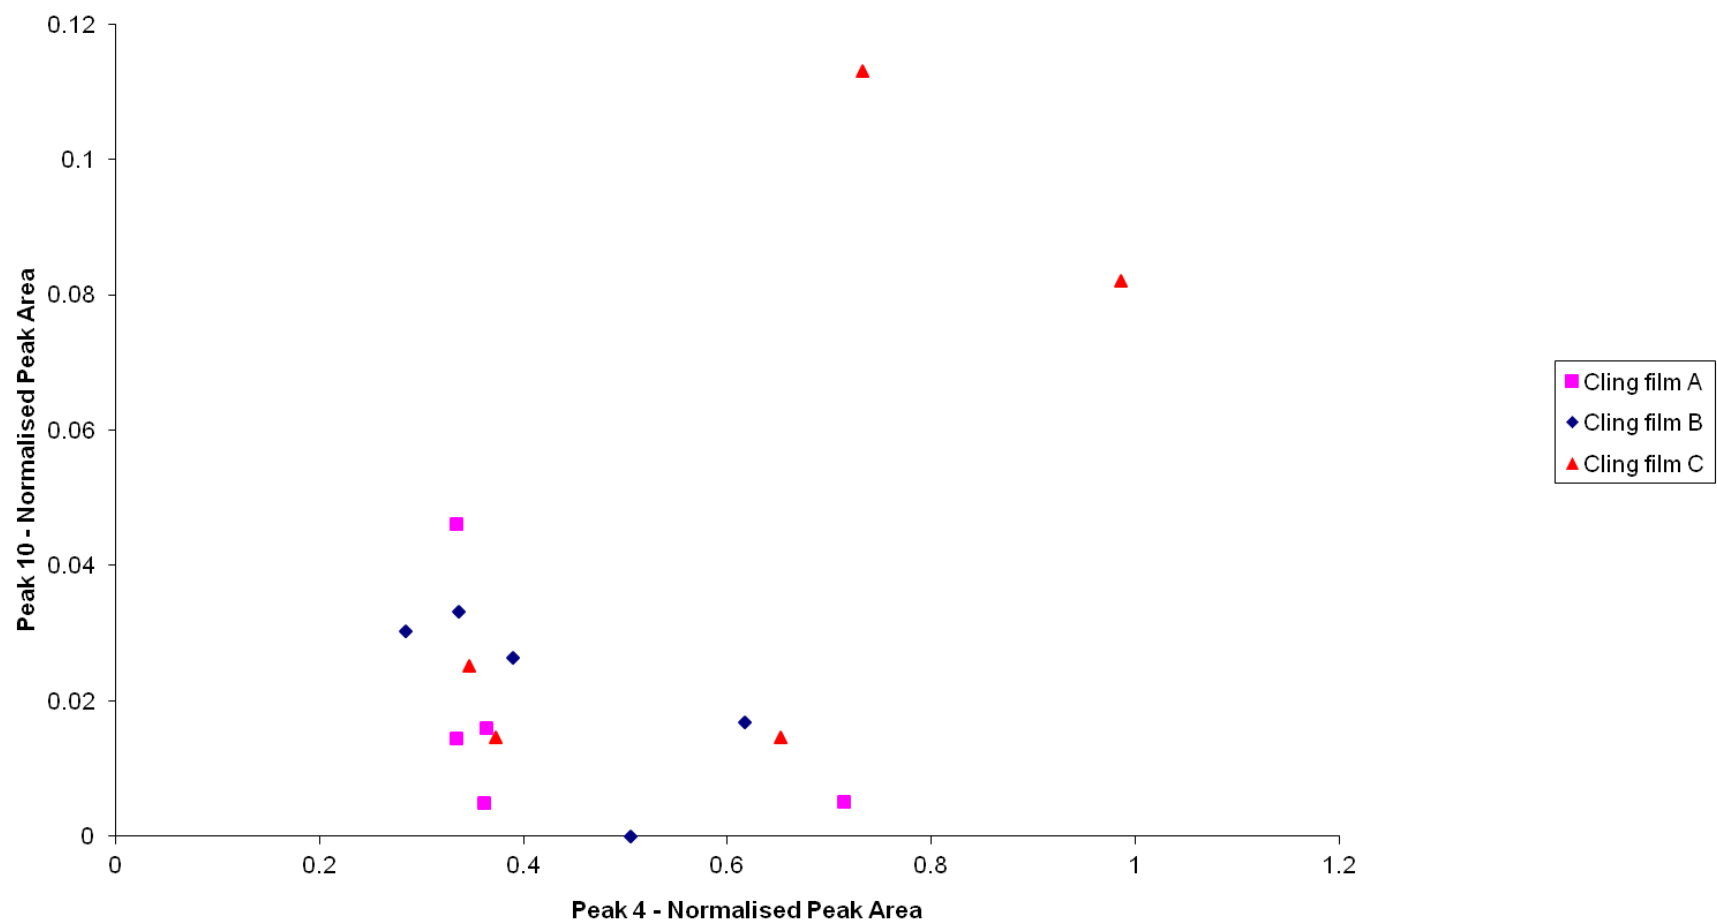

Figure S20 Bivariate plot of the normalised peak areas for peaks 4 and 10 from the five high resolution IR spectra recorded for cling films A,B and C

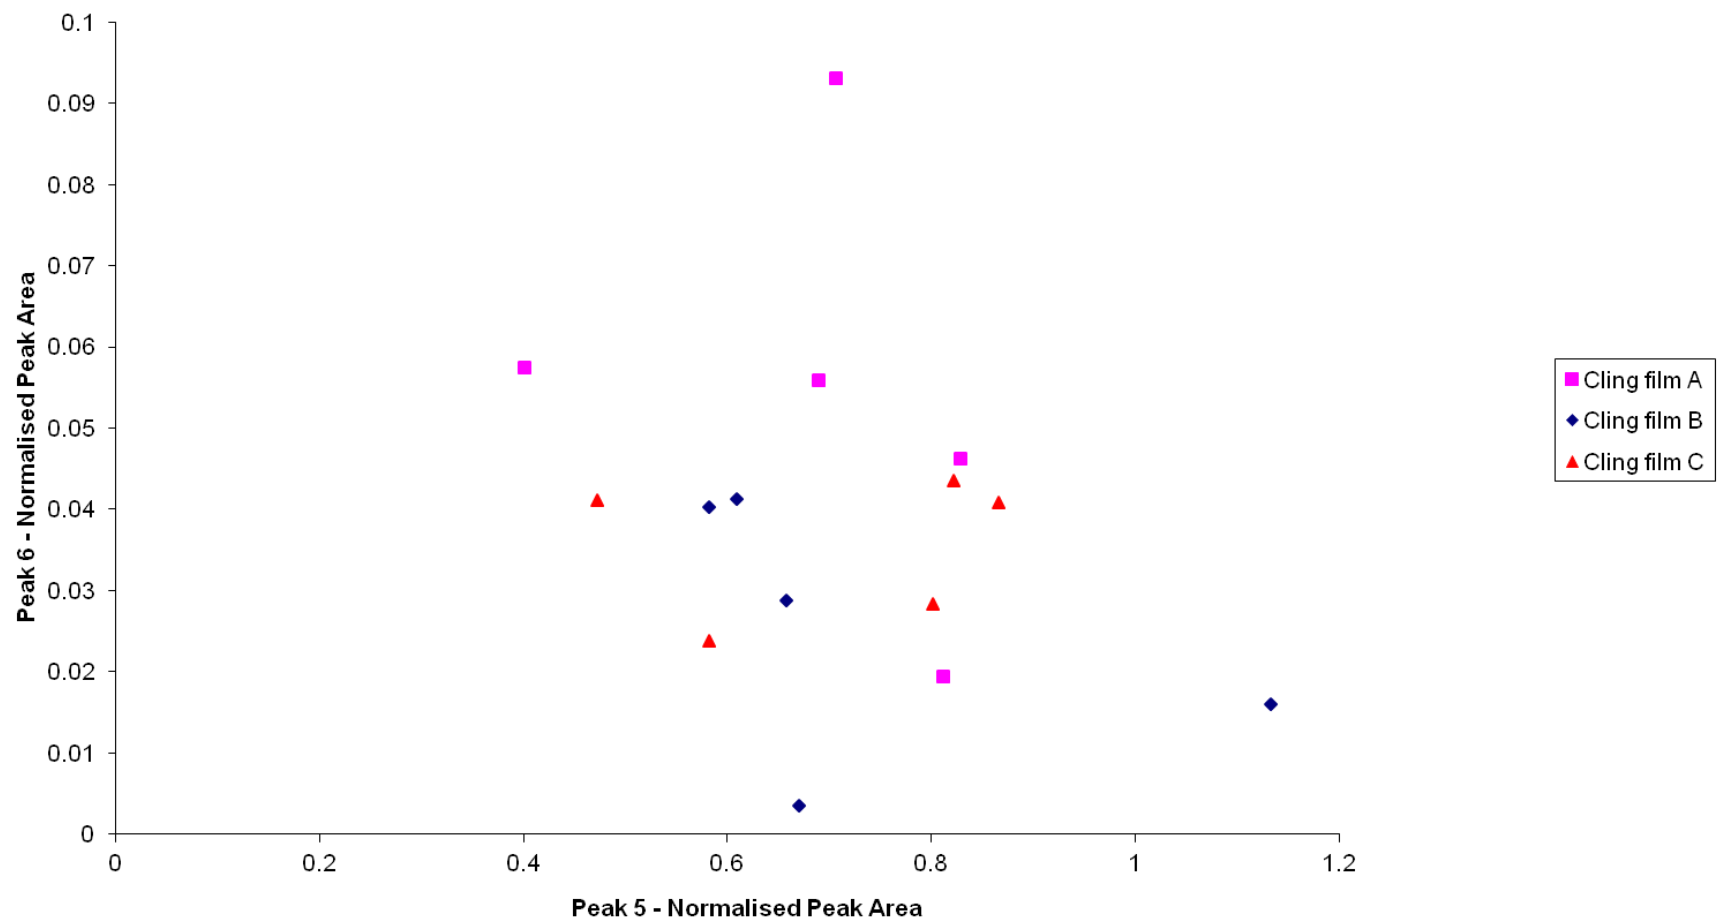

Figure S21 Bivariate plot of the normalised peak areas for peaks 5 and 6 from the five high resolution IR spectra recorded for cling films A, B and C

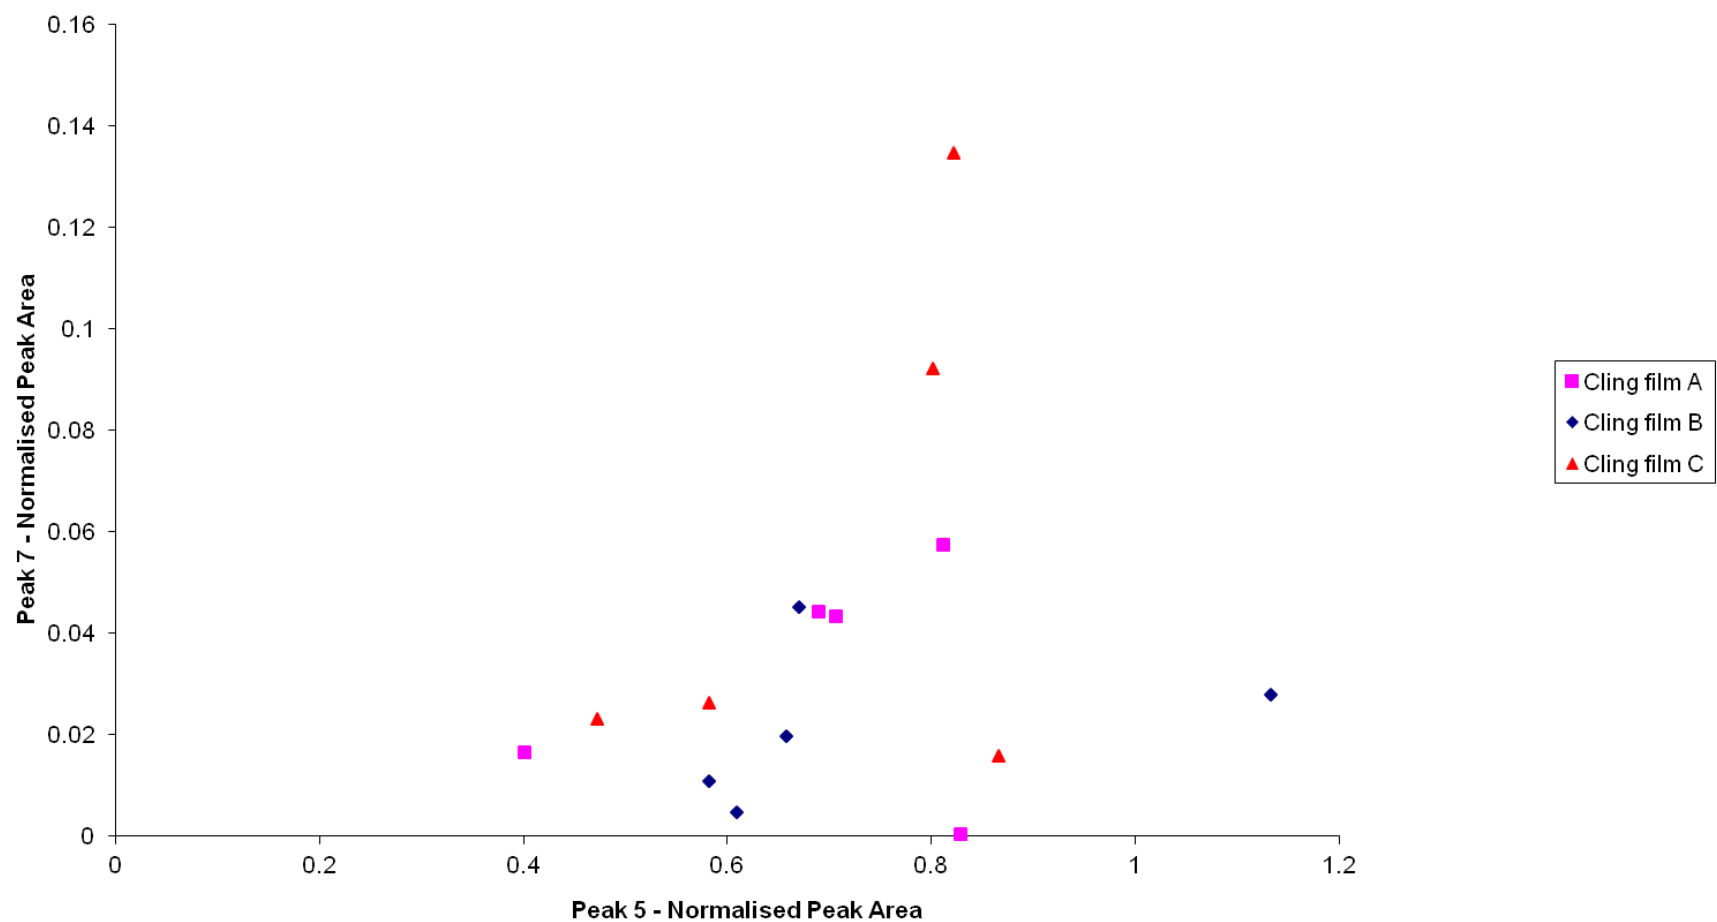

Figure S22 Bivariate plot of the normalised peak areas for peaks 5 and 7 from the five high resolution IR spectra recorded for cling films A, B and C

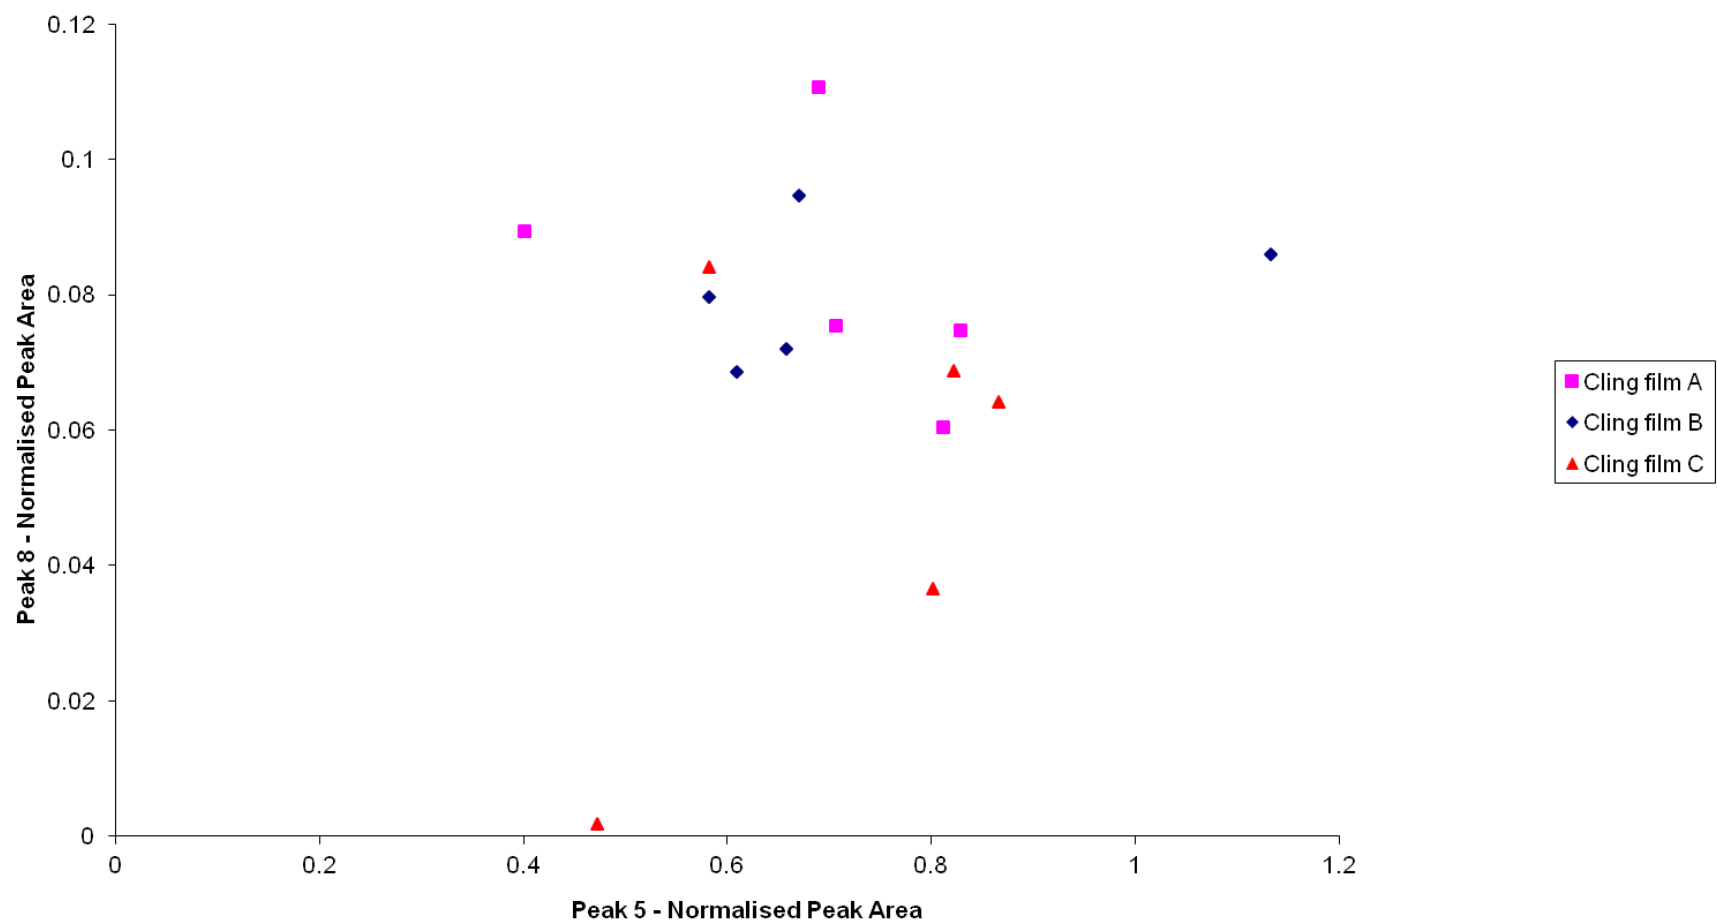

Figure S23 Bivariate plot of the normalised peak areas for peaks 5 and 8 from the five high resolution IR spectra recorded for cling films A, B and C



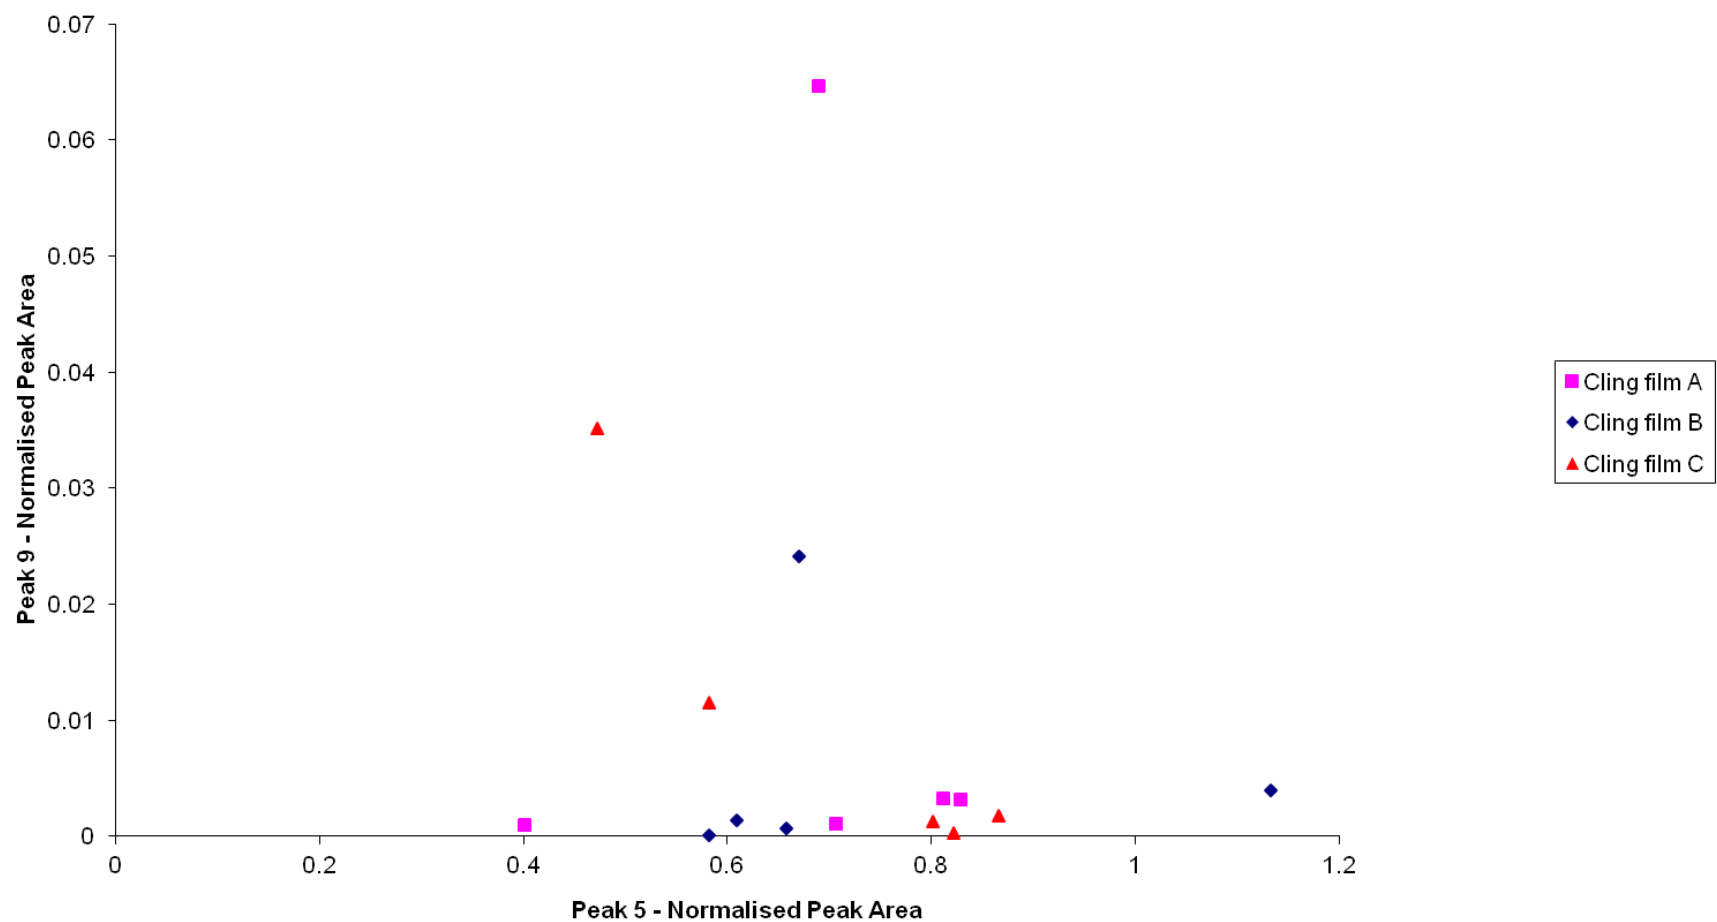

Figure S24 Bivariate plot of the normalised peak areas for peaks 5 and 9 from the five high resolution IR spectra recorded for cling films A, B and C

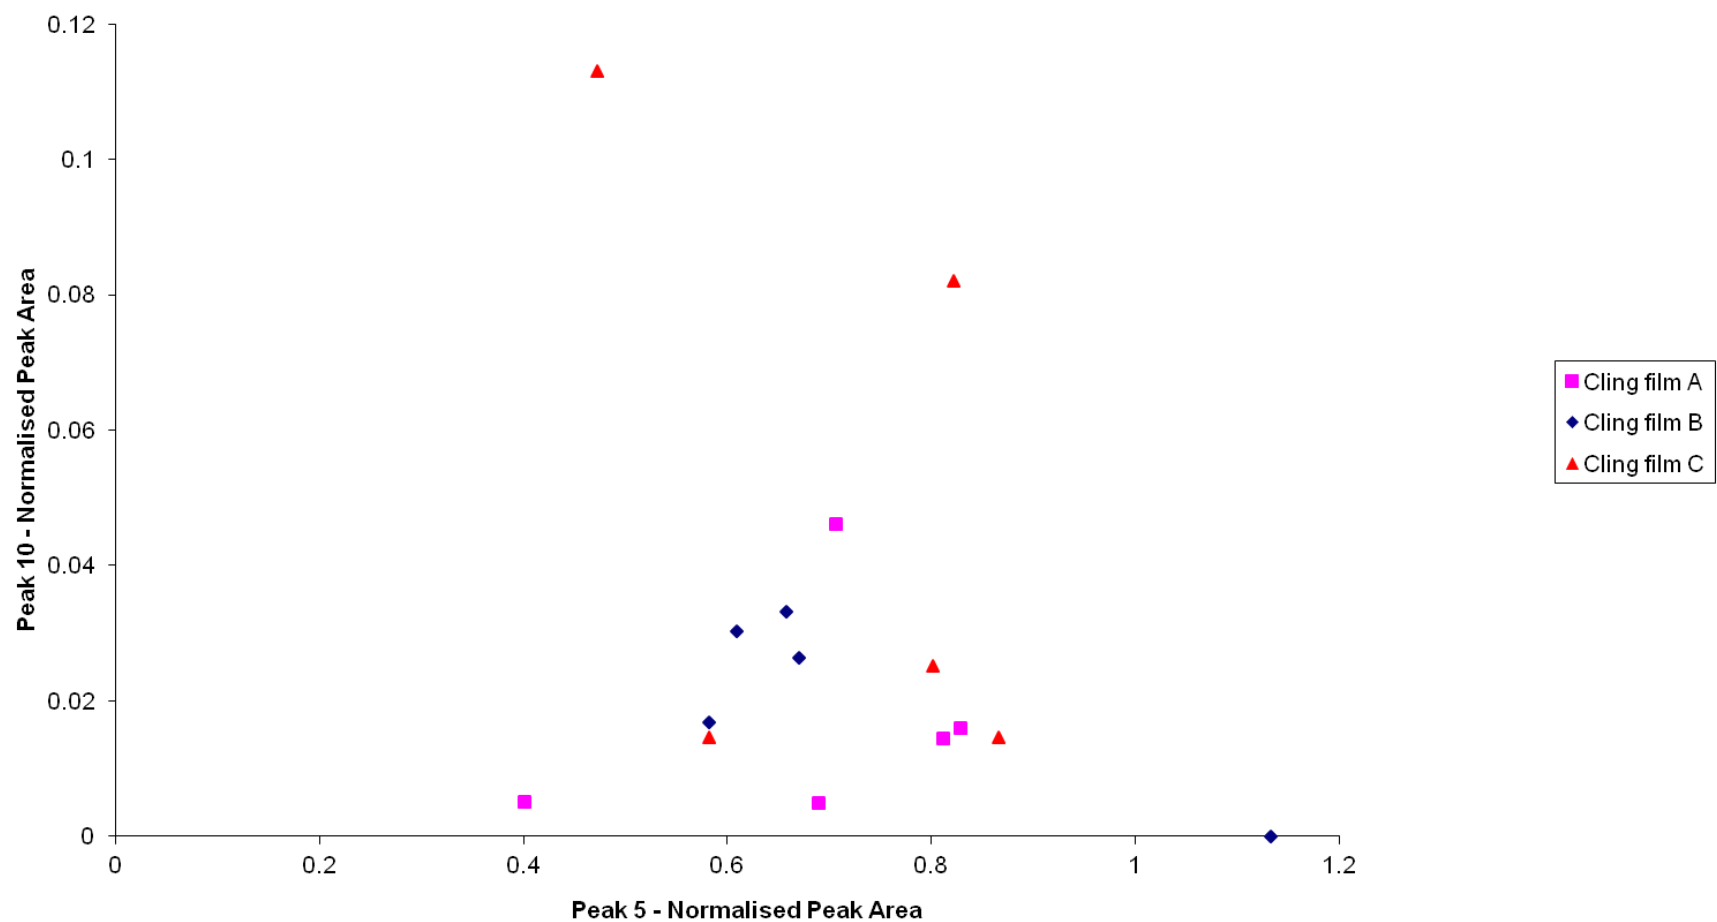

Figure S25 Bivariate plot of the normalised peak areas for peaks 5 and 10 from the five high resolution IR spectra recorded for cling films A, B and C

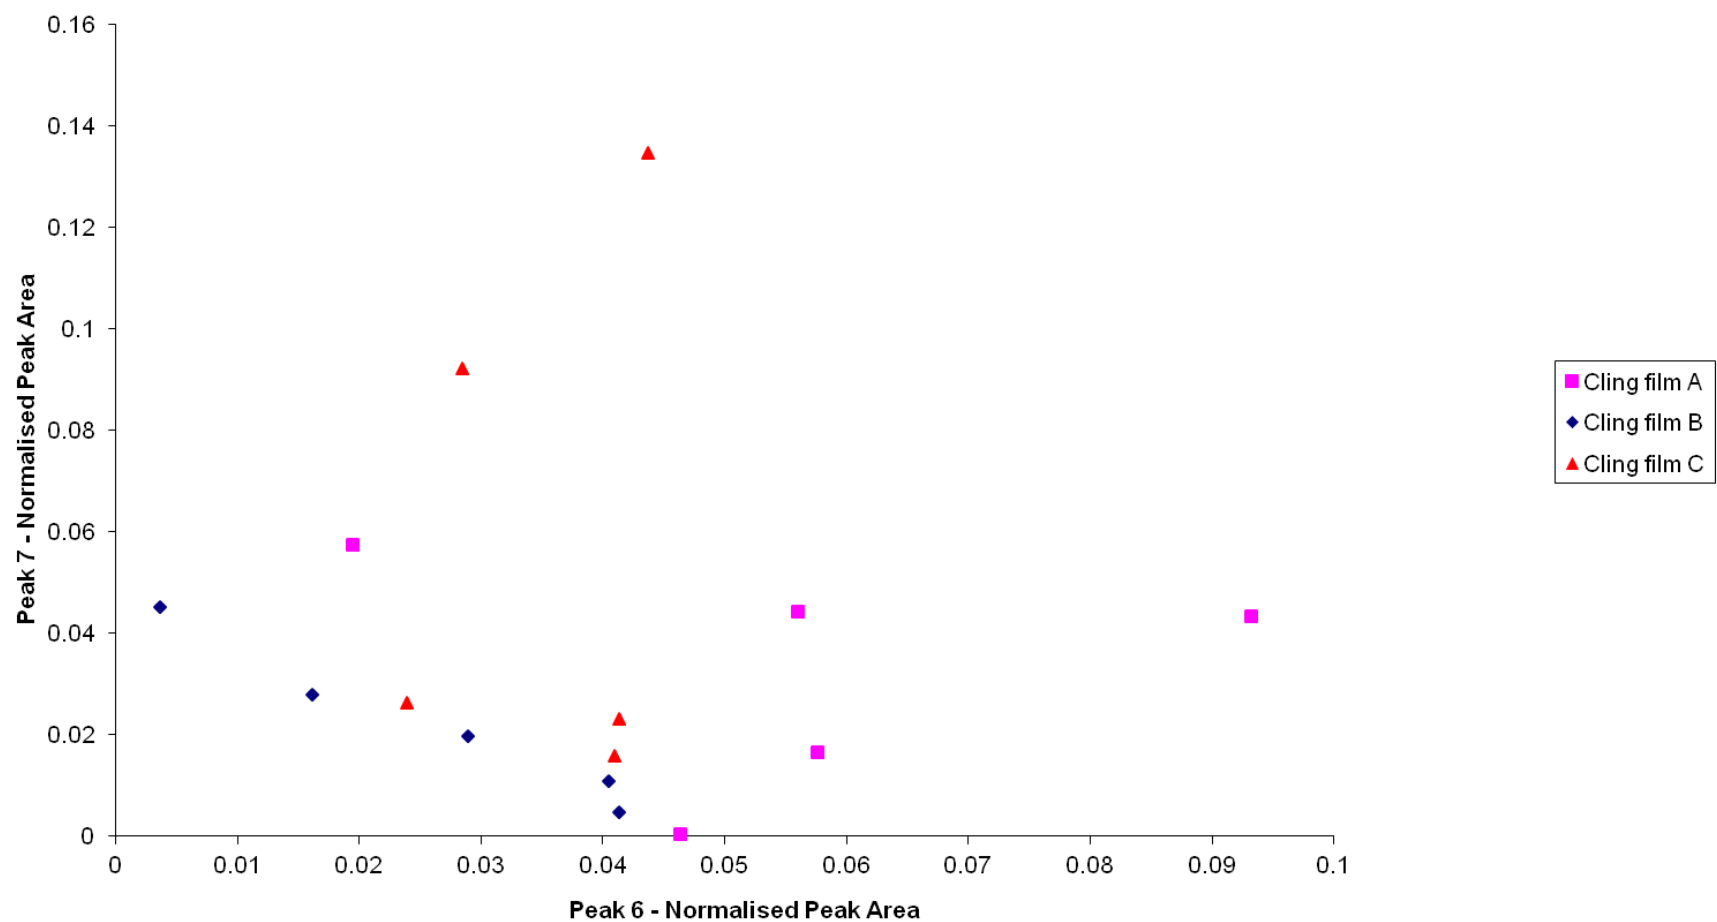

Figure S26 Bivariate plot of the normalised peak areas for peaks 6 and 7 from the five high resolution IR spectra recorded for cling films A, B and C

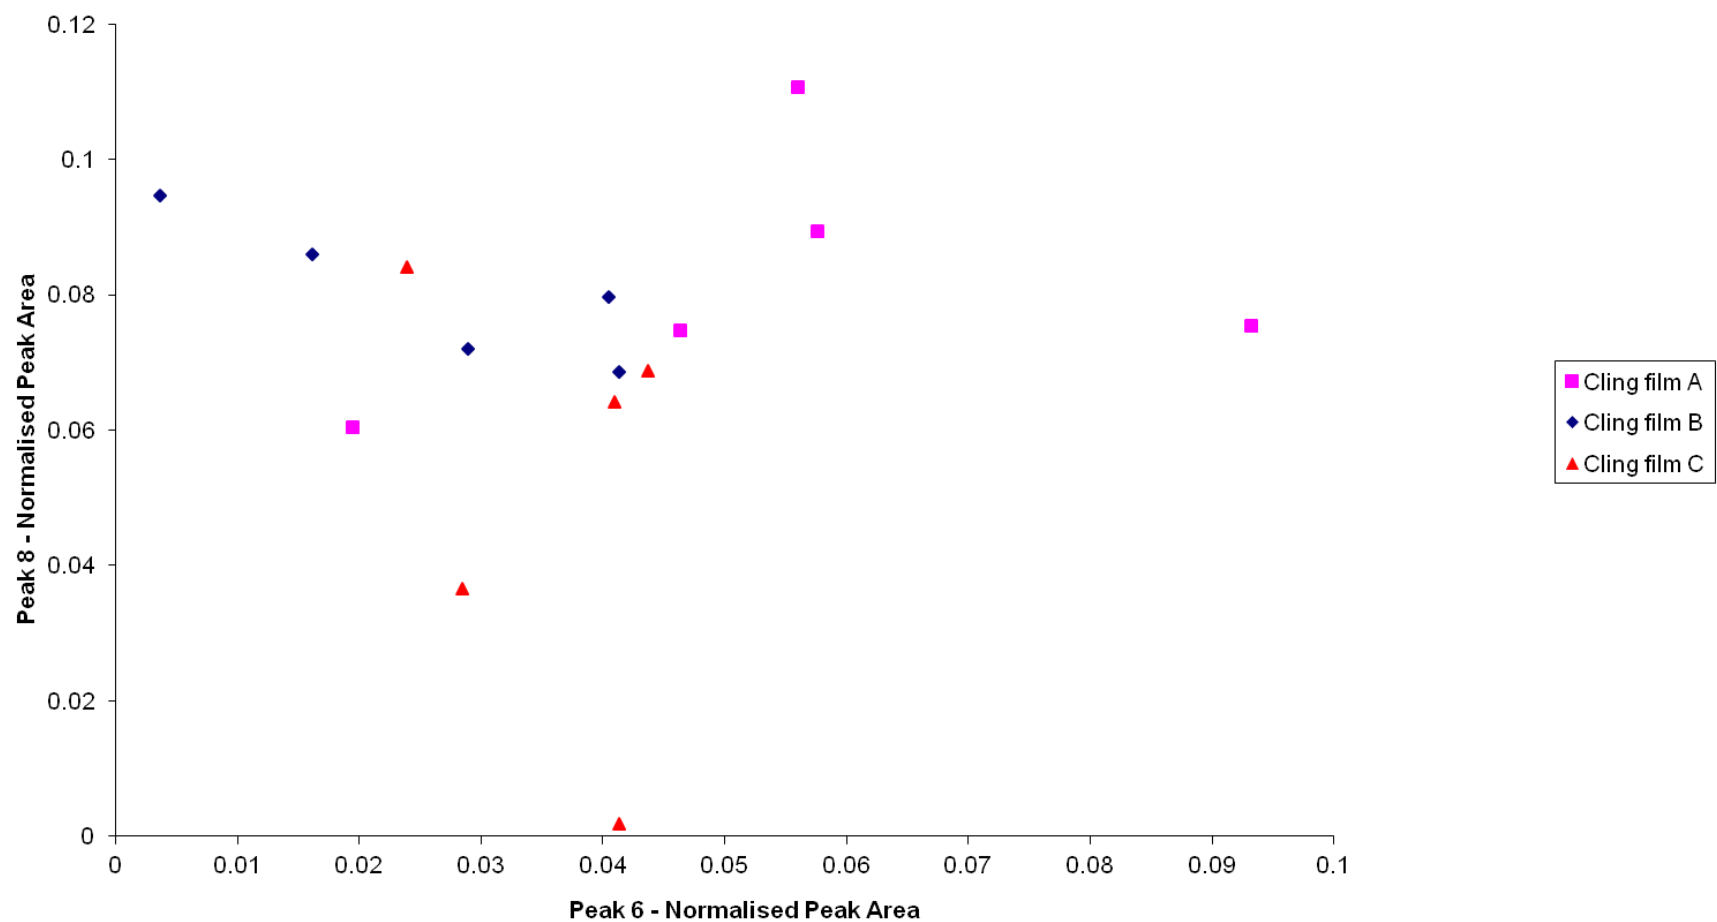

Figure S27 Bivariate plot of the normalised peak areas for peaks 6 and 8 from the five high resolution IR spectra recorded for cling films A, B and C

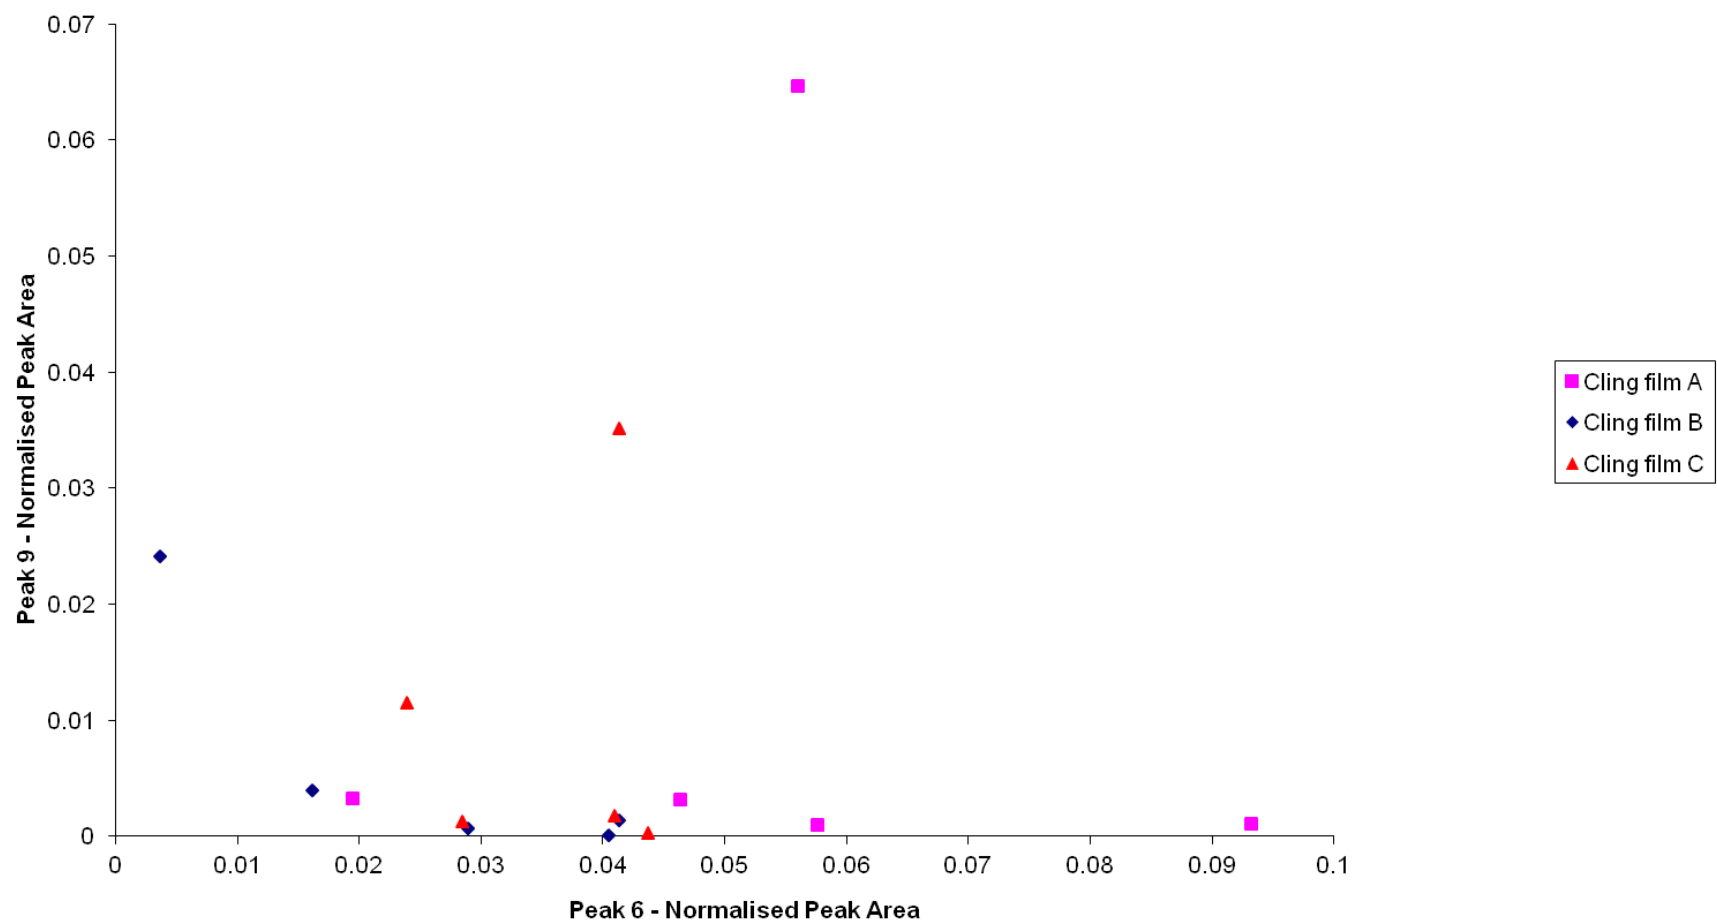

Figure S28 Bivariate plot of the normalised peak areas for peaks 6 and 9 from the five high resolution IR spectra recorded for cling films A, B and C

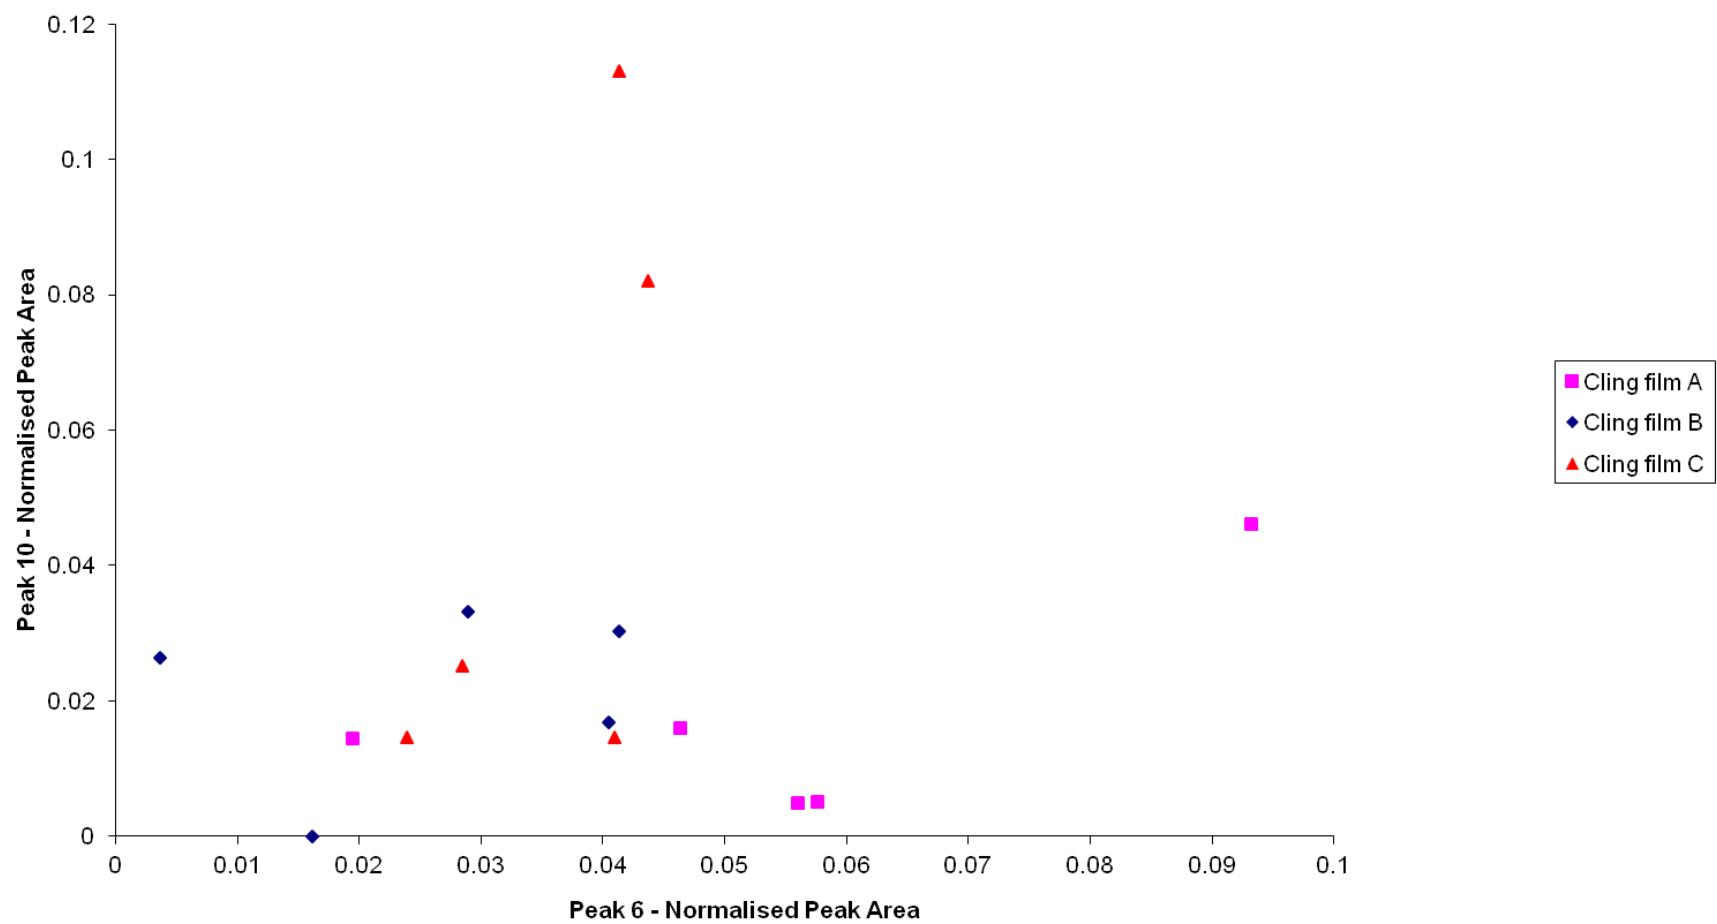

Figure S29 Bivariate plot of the normalised peak areas for peaks 6 and 10 from the five high resolution IR spectra recorded for cling films A, B and C

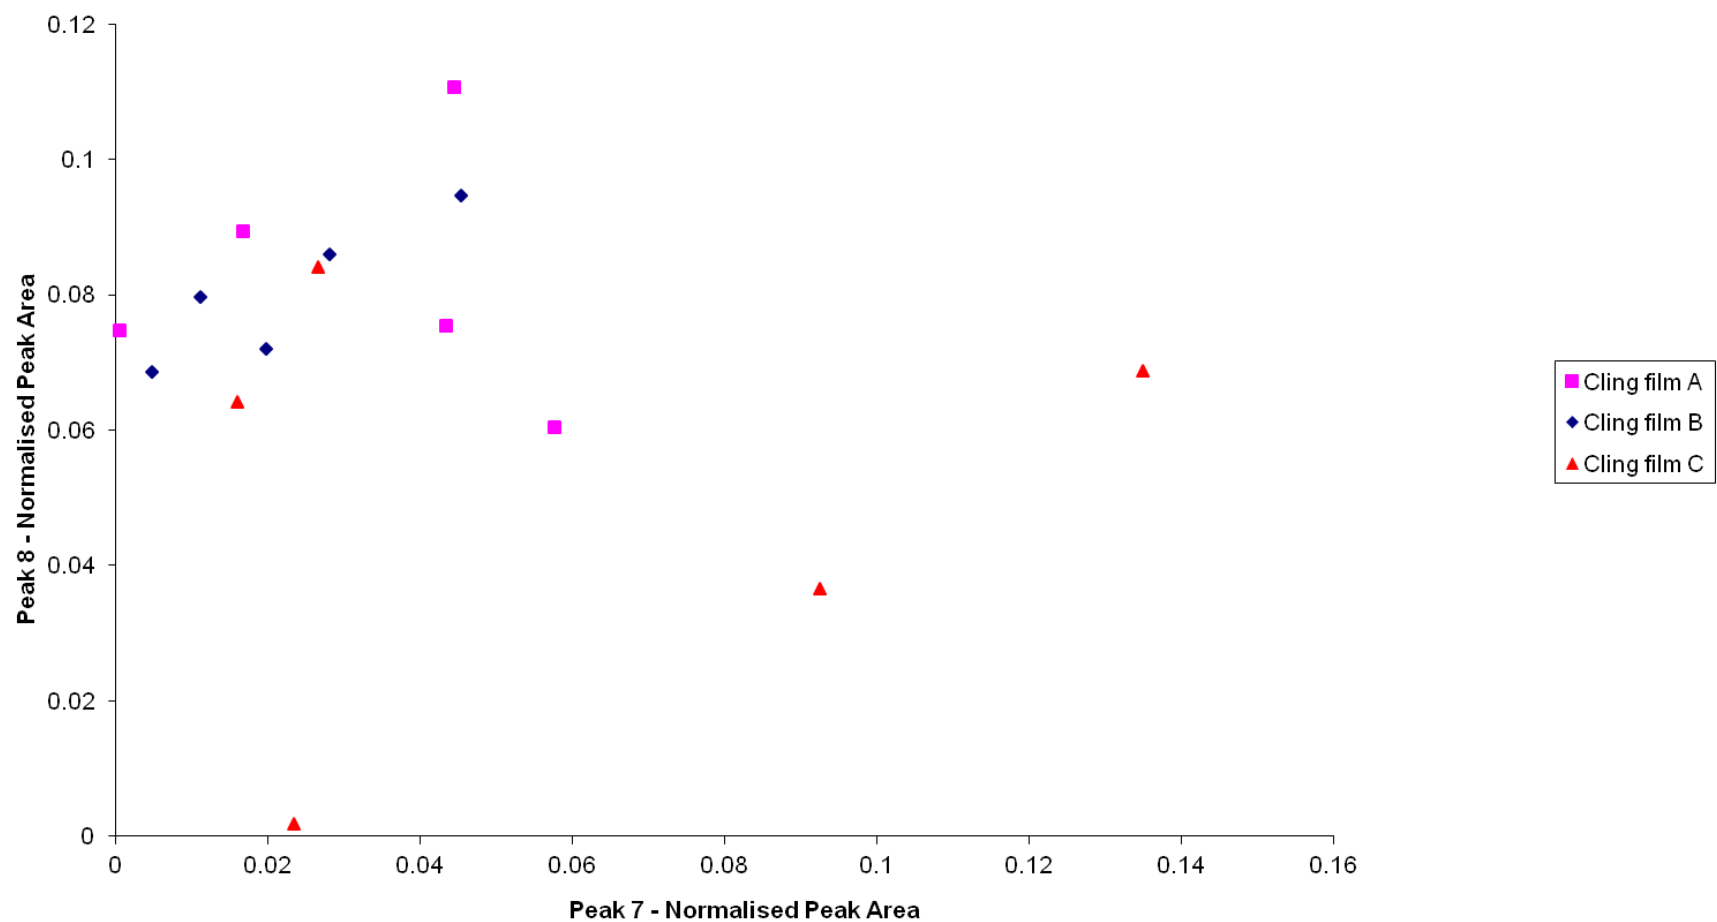

Figure S30 Bivariate plot of the normalised peak areas for peaks 7 and 8 from the five high resolution IR spectra recorded for cling films A, B and C

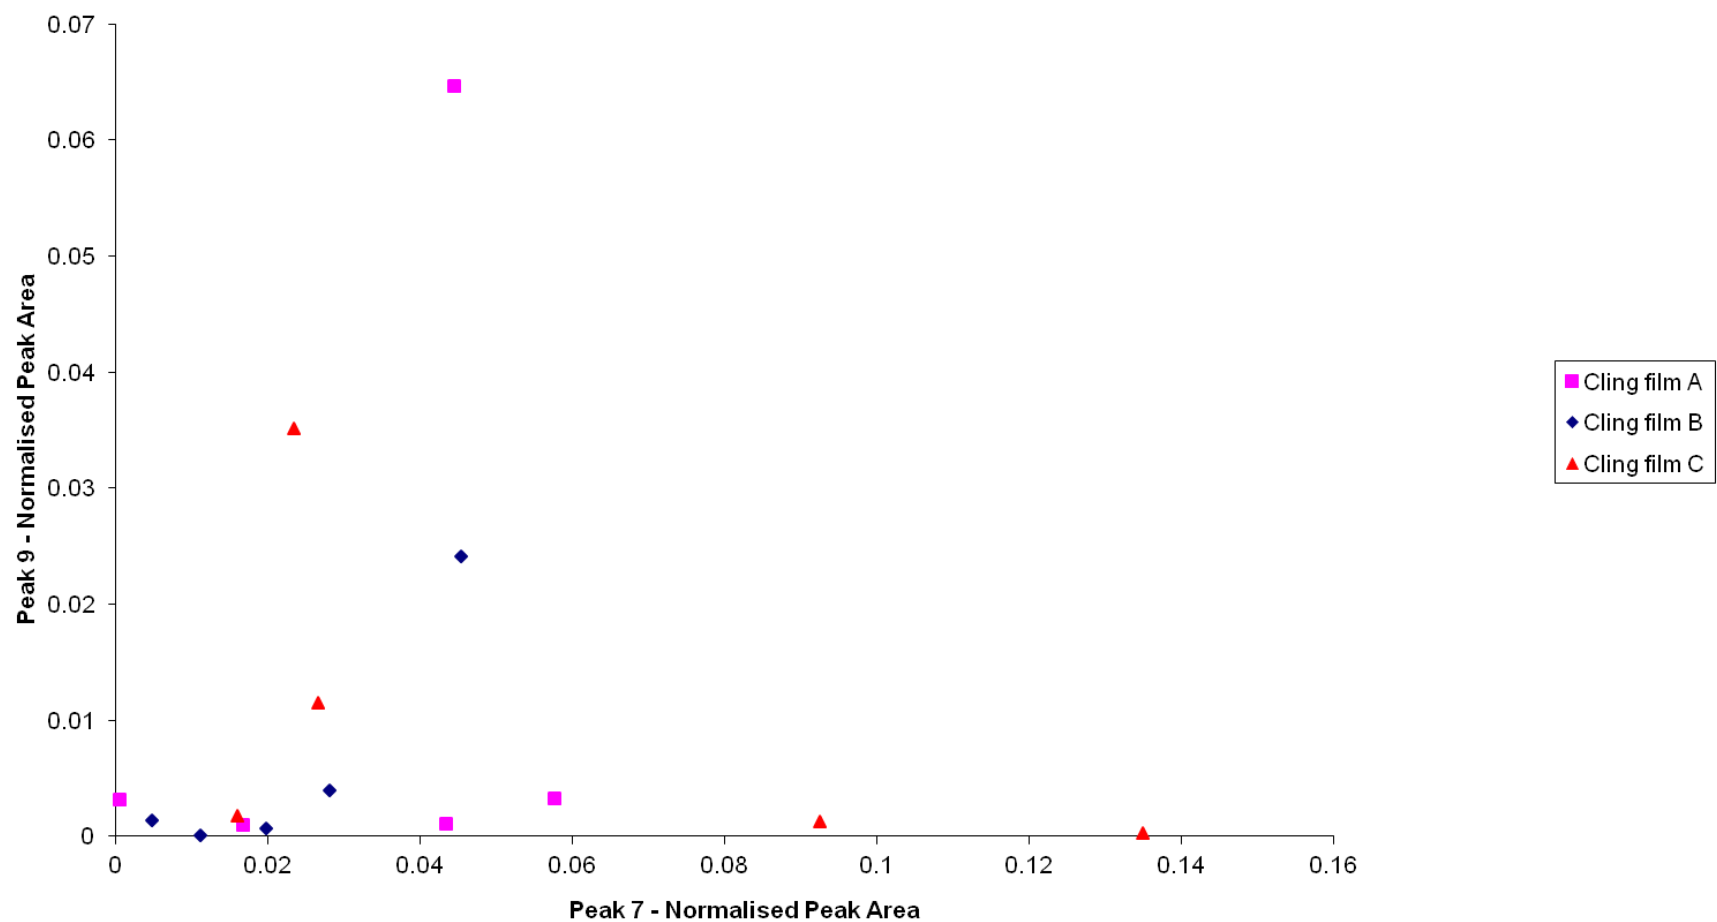

Figure S31 Bivariate plot of the normalised peak areas for peaks 7 and 9 from the five high resolution IR spectra recorded for cling films A, B and C



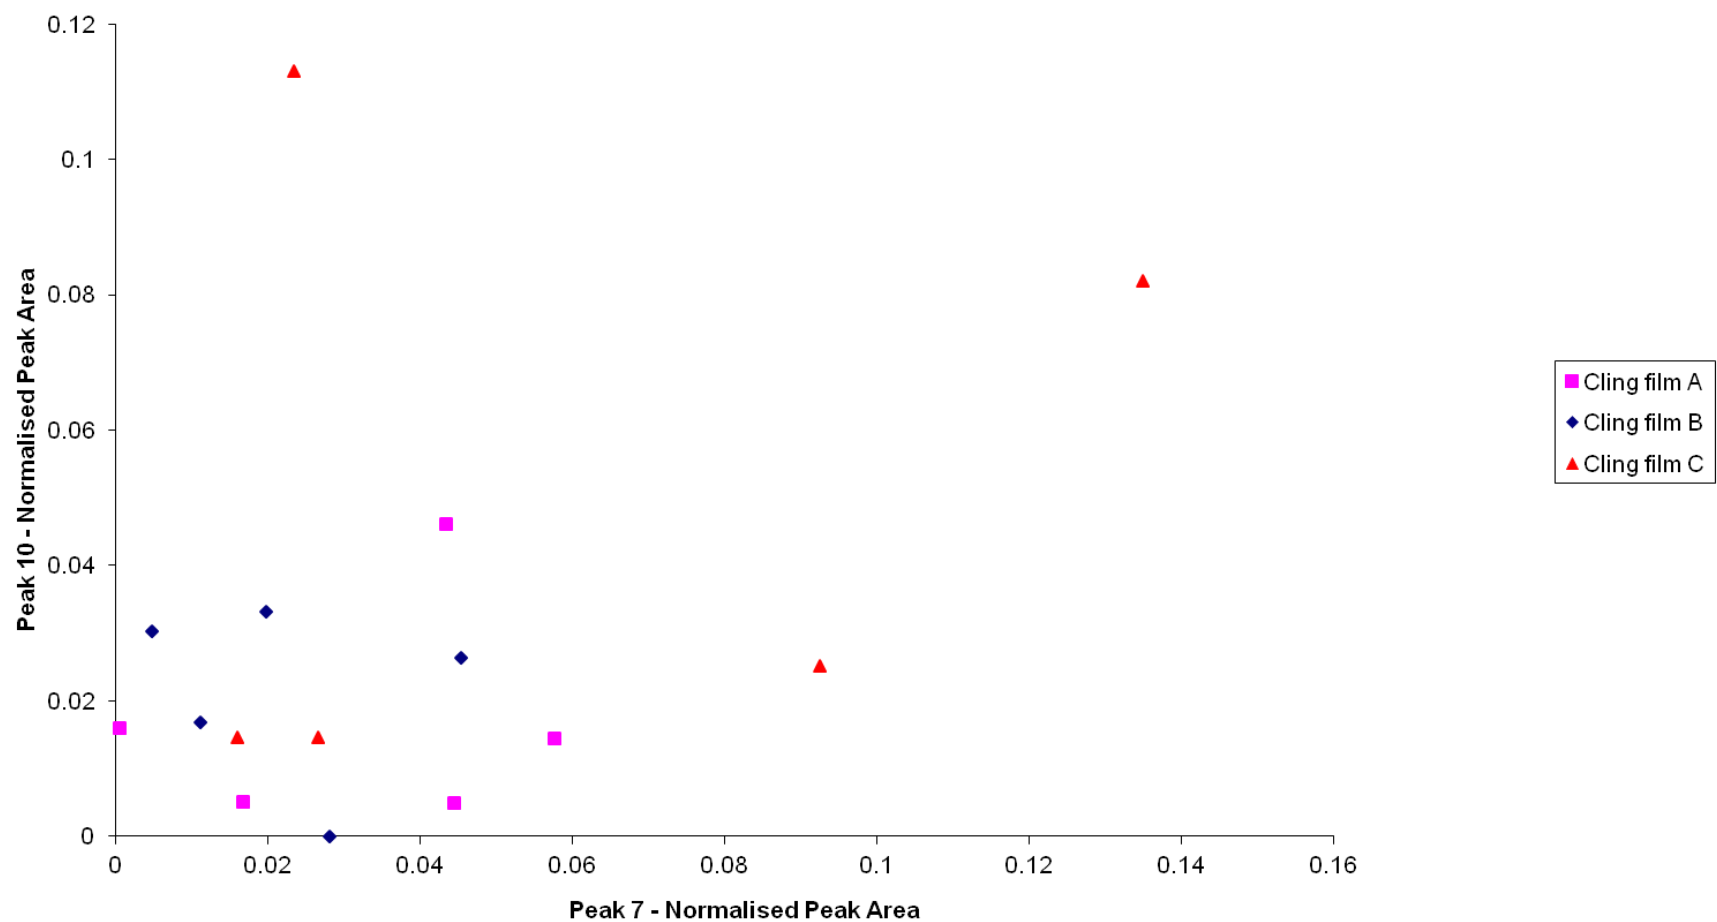

Figure S32 Bivariate plot of the normalised peak areas for peaks 7 and 10 from the five high resolution IR spectra recorded for cling films A, B and C

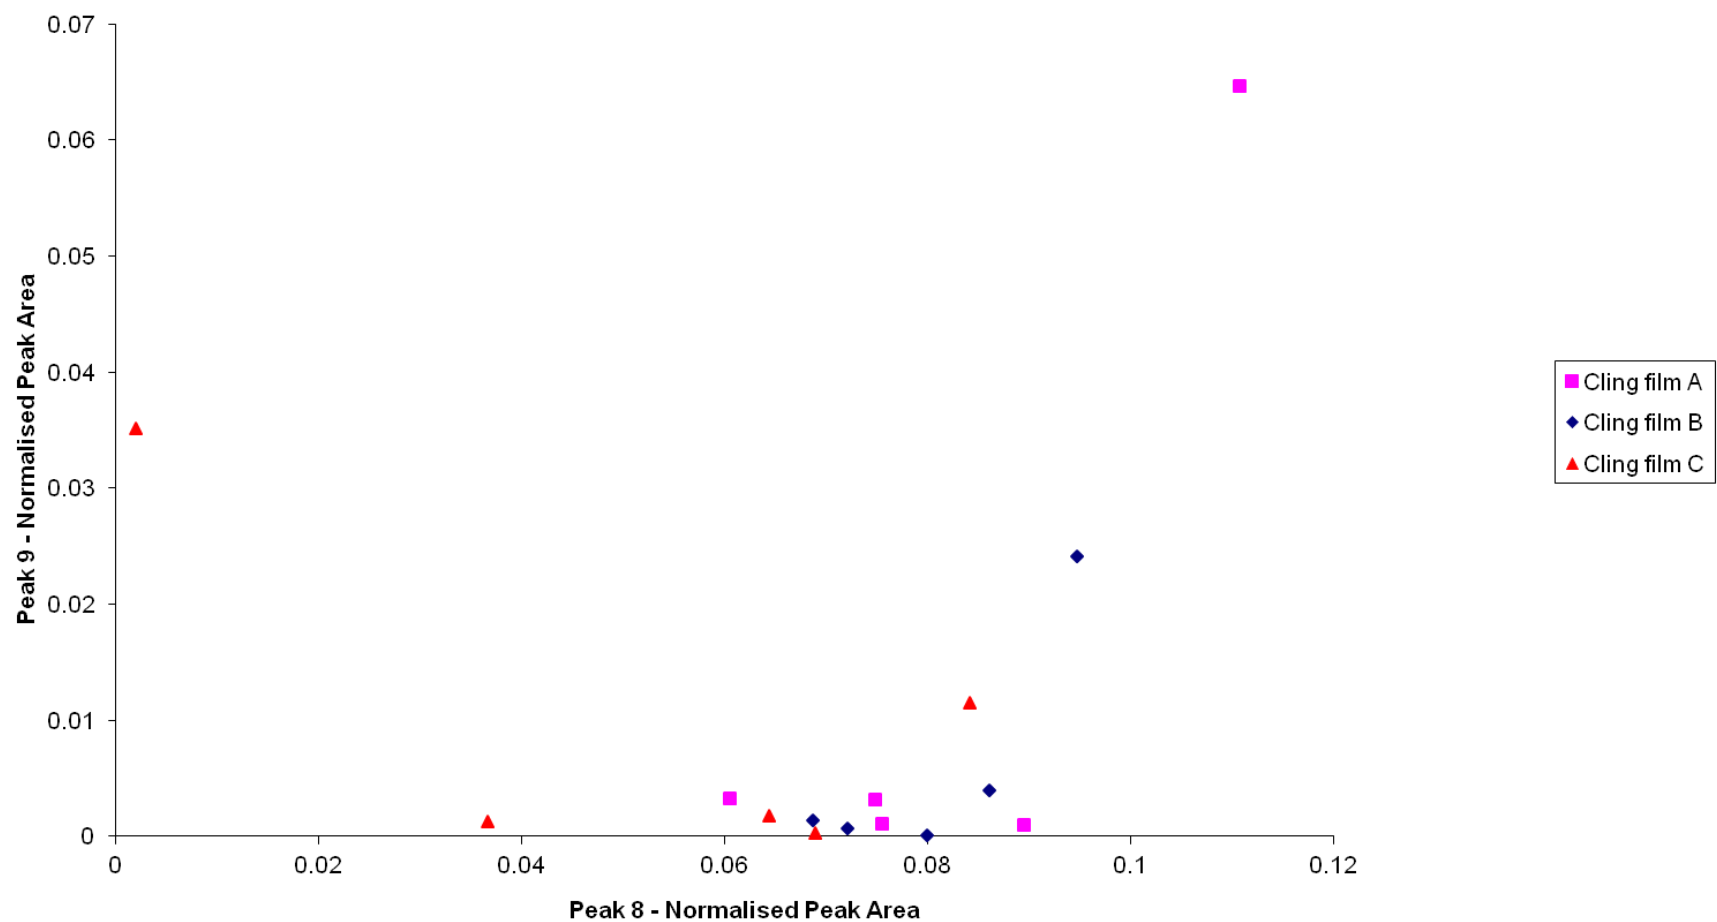

Figure S33 Bivariate plot of the normalised peak areas for peaks 8 and 9 from the five high resolution IR spectra recorded for cling films A, B and C

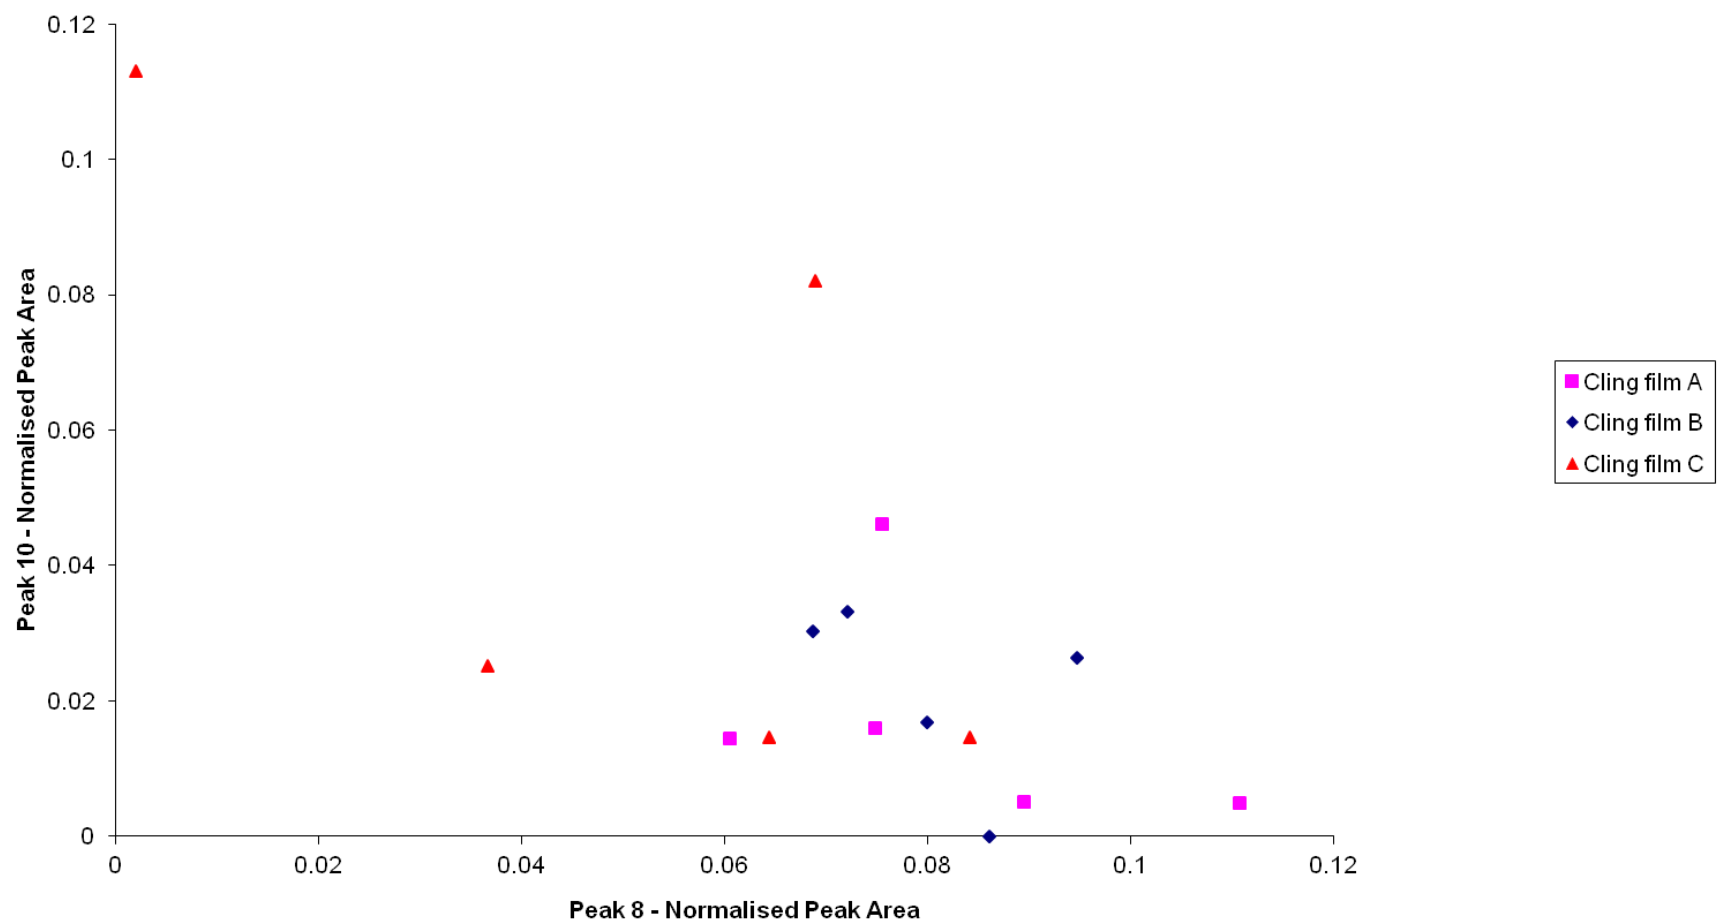

Figure S34 Bivariate plot of the normalised peak areas for peaks 8 and 10 from the five high resolution IR spectra recorded for cling films A, B and C

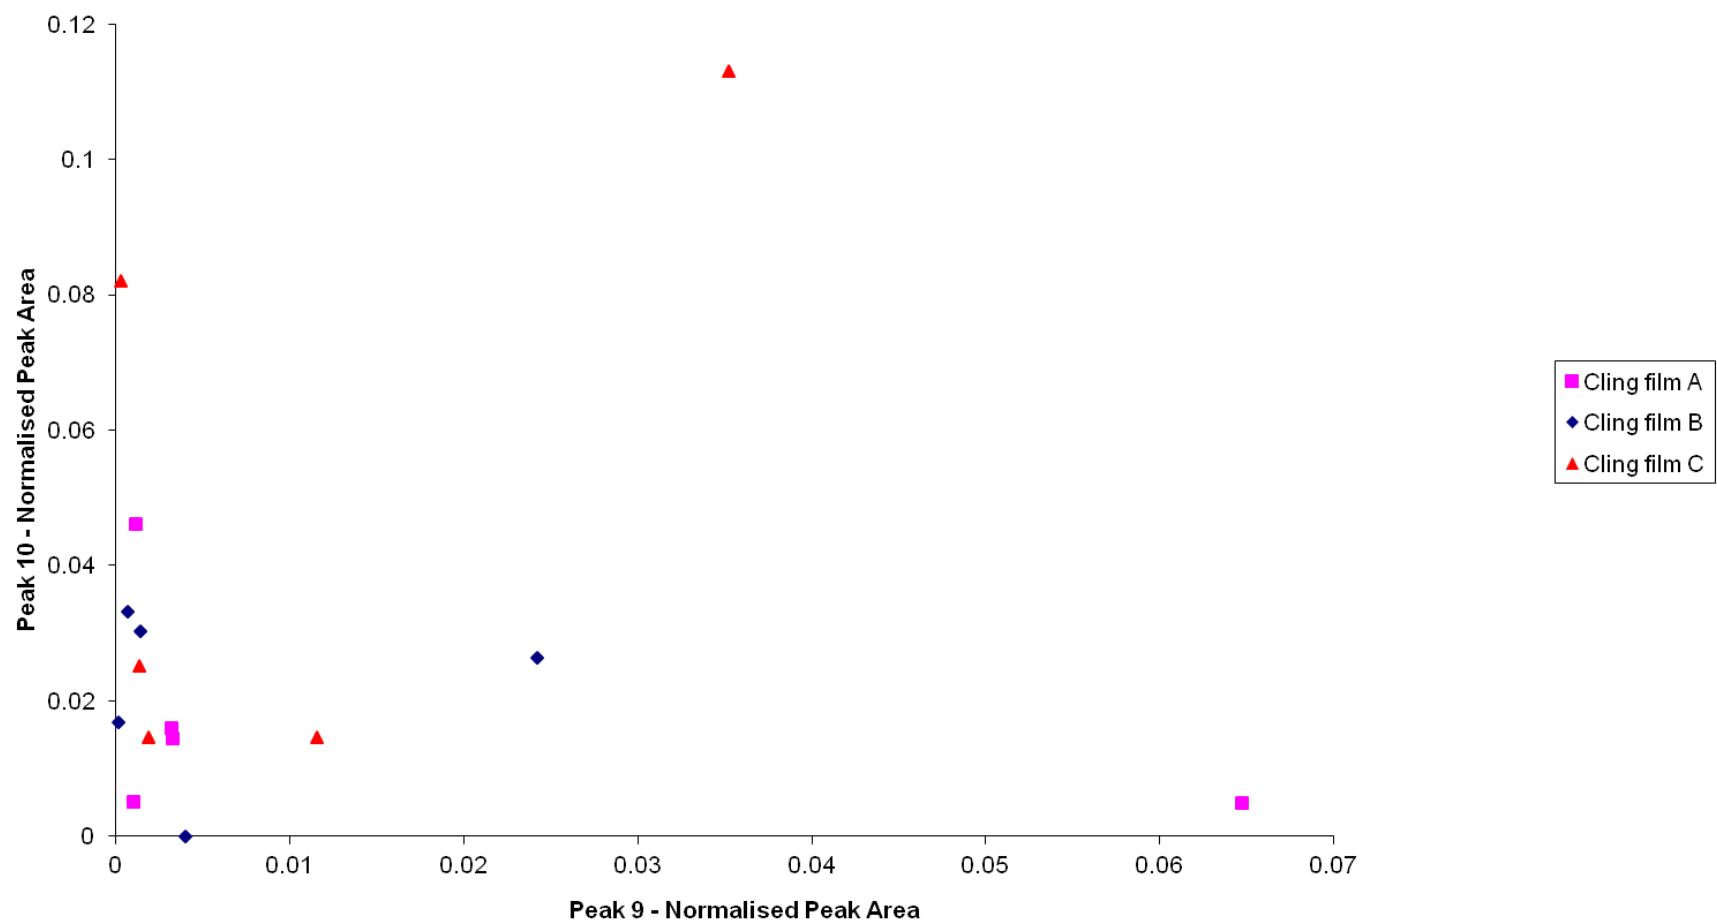

Figure S35 Bivariate plot of the normalised peak areas for peaks 9 and 10 from the five high resolution IR spectra recorded for cling films A, B and C

Table S1                      The mean, standard deviation and relative standard deviation of the peak areas of the ten peaks assigned for Cling film A Square 1, Cling film B Square 14 and Cling film C Square 20

| Peak number/Reading           | 1     | 2      | 3     | 4     | 5     | 6    | 7    | 8     | 9     | 10   |
|-------------------------------|-------|--------|-------|-------|-------|------|------|-------|-------|------|
| <b>CLING FILM A SQUARE 1</b>  |       |        |       |       |       |      |      |       |       |      |
| <b>Mean</b>                   | 17.56 | 116.27 | 15.46 | 46.44 | 83.34 | 6.09 | 3.56 | 9.49  | 1.81  | 1.98 |
| <b>SD</b>                     | 4.03  | 32.4   | 4.05  | 11.5  | 38.4  | 2.71 | 2.79 | 3.22  | 3.43  | 1.68 |
| <b>CV (%)</b>                 | 23.0  | 27.9   | 26.2  | 24.9  | 46.1  | 44.5 | 78.4 | 33.9  | 190.0 | 85.1 |
| <b>CLING FILM B SQUARE 14</b> |       |        |       |       |       |      |      |       |       |      |
| <b>Mean</b>                   | 19.84 | 126.25 | 16.30 | 55.01 | 87.79 | 3.43 | 2.69 | 10.08 | 0.71  | 2.87 |
| <b>SD</b>                     | 6.02  | 39.5   | 4.08  | 29.3  | 20.1  | 2.58 | 1.89 | 3.13  | 1.26  | 1.94 |
| <b>CV (%)</b>                 | 30.4  | 31.3   | 25.0  | 53.3  | 22.9  | 75.2 | 70.5 | 31.1  | 178.0 | 67.7 |
| <b>CLING FILM C SQUARE 20</b> |       |        |       |       |       |      |      |       |       |      |
| <b>Mean</b>                   | 18.71 | 116.25 | 15.66 | 67.64 | 86.19 | 4.24 | 7.00 | 5.92  | 0.94  | 5.44 |
| <b>SD</b>                     | 3.71  | 34.7   | 1.86  | 27.7  | 42.1  | 1.78 | 6.63 | 3.79  | 1.38  | 4.41 |
| <b>CV (%)</b>                 | 19.8  | 29.9   | 11.9  | 41.0  | 48.9  | 41.9 | 94.6 | 64.0  | 147.0 | 81.0 |
